# Supplementary material for: Adaptive strategies to increase fitness after thermal stress in the reef-building coral Acropora
Source: Research Square preprint supplement (doi:10.21203/rs.3.rs-1751930/v1), 2022-07-01
Supplement: Supplementary file 1 [file 082998ab5069cf7df3a8fe62.xlsx]

## Sheet: Survival rate, Adults
Date	Monthcode	Month	Condition	Code	Censore
2018	Aug	1	Control	C1	0
2018	Agu	1	Control	C2	0
2018	Agu	1	Control	C3	0
2018	Agu	1	Control	C4	0
2018	Agu	1	Control	C5	0
2018	Agu	1	Control	C6	0
2018	Agu	1	Stress	S1	0
2018	Agu	1	Stress	S2	0
2018	Agu	1	Stress	S3	0
2018	Agu	1	Stress	S4	0
2018	Agu	1	Stress	S5	0
2018	Agu	1	Stress	S6	0
2018	Sep	2	Control	C1	0
2018	Sep	2	Control	C2	0
2018	Sep	2	Control	C3	0
2018	Sep	2	Control	C4	0
2018	Sep	2	Control	C5	0
2018	Sep	2	Control	C6	0
2018	Sep	2	Stress	S1	0
2018	Sep	2	Stress	S2	0
2018	Sep	2	Stress	S3	0
2018	Sep	2	Stress	S4	0
2018	Sep	2	Stress	S5	0
2018	Sep	2	Stress	S6	0
2018	Oct	3	Control	C1	0
2018	Oct	3	Control	C2	0
2018	Oct	3	Control	C3	0
2018	Oct	3	Control	C4	0
2018	Oct	3	Control	C5	0
2018	Oct	3	Control	C6	0
2018	Oct	3	Stress	S1	0
2018	Oct	3	Stress	S2	0
2018	Oct	3	Stress	S3	0
2018	Oct	3	Stress	S4	0
2018	Oct	3	Stress	S5	1
2018	Oct	3	Stress	S6	0
2018	Nov	4	Control	C1	0
2018	Nov	4	Control	C2	0
2018	Nov	4	Control	C3	0
2018	Nov	4	Control	C4	0
2018	Nov	4	Control	C5	0
2018	Nov	4	Control	C6	0
2018	Nov	4	Stress	S1	0
2018	Nov	4	Stress	S2	0
2018	Nov	4	Stress	S3	0
2018	Nov	4	Stress	S4	0
2018	Nov	4	Stress	S5	1
2018	Nov	4	Stress	S6	0
2018	Des	5	Control	C1	0
2018	Des	5	Control	C2	0
2018	Des	5	Control	C3	0
2018	Des	5	Control	C4	0
2018	Des	5	Control	C5	0
2018	Des	5	Control	C6	0
2018	Des	5	Stress	S1	0
2018	Des	5	Stress	S2	0
2018	Des	5	Stress	S3	0
2018	Des	5	Stress	S4	0
2018	Des	5	Stress	S5	1
2018	Des	5	Stress	S6	0
2018	Jan	6	Control	C1	0
2018	Jan	6	Control	C2	0
2018	Jan	6	Control	C3	0
2018	Jan	6	Control	C4	0
2018	Jan	6	Control	C5	0
2018	Jan	6	Control	C6	0
2018	Jan	6	Stress	S1	0
2018	Jan	6	Stress	S2	0
2018	Jan	6	Stress	S3	0
2018	Jan	6	Stress	S4	0
2018	Jan	6	Stress	S5	1
2018	Jan	6	Stress	S6	0
2018	Feb	7	Control	C1	0
2018	Feb	7	Control	C2	0
2018	Feb	7	Control	C3	0
2018	Feb	7	Control	C4	0
2018	Feb	7	Control	C5	0
2018	Feb	7	Control	C6	0
2018	Feb	7	Stress	S1	0
2018	Feb	7	Stress	S2	0
2018	Feb	7	Stress	S3	0
2018	Feb	7	Stress	S4	0
2018	Feb	7	Stress	S5	1
2018	Feb	7	Stress	S6	0
2018	Mar	8	Control	C1	0
2018	Mar	8	Control	C2	0
2018	Mar	8	Control	C3	0
2018	Mar	8	Control	C4	0
2018	Mar	8	Control	C5	0
2018	Mar	8	Control	C6	0
2018	Mar	8	Stress	S1	0
2018	Mar	8	Stress	S2	0
2018	Mar	8	Stress	S3	0
2018	Mar	8	Stress	S4	0
2018	Mar	8	Stress	S5	1
2018	Mar	8	Stress	S6	0
2018	Apr	9	Control	C1	0
2018	Apr	9	Control	C2	0
2018	Apr	9	Control	C3	0
2018	Apr	9	Control	C4	0
2018	Apr	9	Control	C5	0
2018	Apr	9	Control	C6	0
2018	Apr	9	Stress	S1	0
2018	Apr	9	Stress	S2	0
2018	Apr	9	Stress	S3	0
2018	Apr	9	Stress	S4	0
2018	Apr	9	Stress	S5	1
2018	Apr	9	Stress	S6	0
2018	May	10	Control	C1	0
2018	May	10	Control	C2	0
2018	May	10	Control	C3	0
2018	May	10	Control	C4	0
2018	May	10	Control	C5	0
2018	May	10	Control	C6	0
2018	May	10	Stress	S1	0
2018	May	10	Stress	S2	0
2018	May	10	Stress	S3	0
2018	May	10	Stress	S4	0
2018	May	10	Stress	S5	1
2018	May	10	Stress	S6	0
2018	Jun	11	Control	C1	0
2018	Jun	11	Control	C2	0
2018	Jun	11	Control	C3	0
2018	Jun	11	Control	C4	0
2018	Jun	11	Control	C5	0
2018	Jun	11	Control	C6	0
2018	Jun	11	Stress	S1	0
2018	Jun	11	Stress	S2	0
2018	Jun	11	Stress	S3	0
2018	Jun	11	Stress	S4	0
2018	Jun	11	Stress	S5	1
2018	Jun	11	Stress	S6	0

## Sheet: Fv Fm,Adults
Date	Days		Code	No	One	Two	Three	FvFm
20180830	0	Control	C1	1	0.695	0.701	0.693	0.696
20180830	0	Control	C2	2	0.722	0.701	0.703	0.709
20180830	0	Control	C3	3	0.719	0.711	0.744	0.725
20180830	0	Control	C4	4	0.71	0.704	0.728	0.714
20180830	0	Control	C5	5	0.732	0.693	0.703	0.709
20180830	0	Control	C6	6	0.732	0.701	0.695	0.709
20180830	0	Stress	S1	1	0.698	0.722	0.69	0.703
20180830	0	Stress	S2	2	0.712	0.693	0.705	0.703
20180830	0	Stress	S3	3	0.713	0.714	0.729	0.719
20180830	0	Stress	S4	4	0.698	0.701	0.702	0.7
20180830	0	Stress	S5	5	0.697	0.697	0.691	0.695
20180830	0	Stress	S6	6	0.707	0.692	0.699	0.699
20180831	1	Control	C1	1	0.685	0.721	0.683	0.696
20180831	1	Control	C2	2	0.702	0.691	0.683	0.692
20180831	1	Control	C3	3	0.709	0.718	0.761	0.729
20180831	1	Control	C4	4	0.714	0.684	0.708	0.702
20180831	1	Control	C5	5	0.712	0.685	0.702	0.7
20180831	1	Control	C6	6	0.714	0.694	0.694	0.701
20180831	1	Stress	S1	1	0.678	0.704	0.696	0.693
20180831	1	Stress	S2	2	0.732	0.655	0.685	0.691
20180831	1	Stress	S3	3	0.703	0.714	0.736	0.718
20180831	1	Stress	S4	4	0.678	0.697	0.699	0.691
20180831	1	Stress	S5	5	0.677	0.677	0.691	0.682
20180831	1	Stress	S6	6	0.697	0.713	0.722	0.711
20180901	2	Control	C1	1	0.727	0.7	0.679	0.702
20180901	2	Control	C2	2	0.742	0.68	0.714	0.712
20180901	2	Control	C3	3	0.74	0.665	0.707	0.704
20180901	2	Control	C4	4	0.703	0.704	0.727	0.711
20180901	2	Control	C5	5	0.699	0.712	0.718	0.71
20180901	2	Control	C6	6	0.703	0.696	0.701	0.7
20180901	2	Stress	S1	1	0.668	0.689	0.699	0.685
20180901	2	Stress	S2	2	0.681	0.708	0.694	0.694
20180901	2	Stress	S3	3	0.72	0.709	0.712	0.714
20180901	2	Stress	S4	4	0.701	0.66	0.69	0.684
20180901	2	Stress	S5	5	0.703	0.712	0.696	0.704
20180901	2	Stress	S6	6	0.684	0.701	0.692	0.692
20180902	3	Control	C1	1	0.701	0.692	0.714	0.702
20180902	3	Control	C2	2	0.704	0.721	0.705	0.71
20180902	3	Control	C3	3	0.733	0.725	0.726	0.728
20180902	3	Control	C4	4	0.701	0.697	0.693	0.697
20180902	3	Control	C5	5	0.741	0.718	0.708	0.722
20180902	3	Control	C6	6	0.713	0.701	0.702	0.705
20180902	3	Stress	S1	1	0.681	0.681	0.697	0.686
20180902	3	Stress	S2	2	0.743	0.684	0.75	0.726
20180902	3	Stress	S3	3	0.715	0.701	0.673	0.696
20180902	3	Stress	S4	4	0.679	0.676	0.678	0.678
20180902	3	Stress	S5	5	0.714	0.645	0.695	0.685
20180902	3	Stress	S6	6	0.667	0.669	0.685	0.674
20180903	4	Control	C1	1	0.721	0.713	0.721	0.718
20180903	4	Control	C2	2	0.711	0.671	0.691	0.691
20180903	4	Control	C3	3	0.721	0.738	0.715	0.725
20180903	4	Control	C4	4	0.745	0.697	0.717	0.72
20180903	4	Control	C5	5	0.737	0.731	0.735	0.734
20180903	4	Control	C6	6	0.732	0.729	0.692	0.718
20180903	4	Stress	S1	1	0.711	0.722	0.711	0.715
20180903	4	Stress	S2	2	0.708	0.759	0.698	0.722
20180903	4	Stress	S3	3	0.723	0.701	0.721	0.715
20180903	4	Stress	S4	4	0.719	0.721	0.692	0.711
20180903	4	Stress	S5	5	0.743	0.694	0.727	0.721
20180903	4	Stress	S6	6	0.699	0.691	0.684	0.691
20180904	5	Control	C1	1	0.691	0.685	0.715	0.697
20180904	5	Control	C2	2	0.713	0.687	0.716	0.705
20180904	5	Control	C3	3	0.68	0.611	0.723	0.671
20180904	5	Control	C4	4	0.701	0.709	0.682	0.697
20180904	5	Control	C5	5	0.673	0.732	0.726	0.71
20180904	5	Control	C6	6	0.723	0.672	0.701	0.699
20180904	5	Stress	S1	1	0.632	0.627	0.667	0.642
20180904	5	Stress	S2	2	0.693	0.732	0.704	0.71
20180904	5	Stress	S3	3	0.685	0.707	0.713	0.702
20180904	5	Stress	S4	4	0.684	0.649	0.655	0.663
20180904	5	Stress	S5	5	0.675	0.665	0.684	0.675
20180904	5	Stress	S6	6	0.718	0.713	0.674	0.702
20180905	6	Control	C1	1	0.69	0.586	0.695	0.657
20180905	6	Control	C2	2	0.721	0.746	0.691	0.719
20180905	6	Control	C3	3	0.712	0.715	0.711	0.713
20180905	6	Control	C4	4	0.697	0.675	0.681	0.684
20180905	6	Control	C5	5	0.702	0.703	0.731	0.712
20180905	6	Control	C6	6	0.701	0.722	0.712	0.712
20180905	6	Stress	S1	1	0.701	0.696	0.678	0.692
20180905	6	Stress	S2	2	0.703	0.727	0.686	0.705
20180905	6	Stress	S3	3	0.679	0.628	0.664	0.657
20180905	6	Stress	S4	4	0.693	0.635	0.701	0.676
20180905	6	Stress	S5	5	0.668	0.699	0.683	0.683
20180905	6	Stress	S6	6	0.691	0.701	0.701	0.698
20180906	7	Control	C1	1	0.703	0.683	0.753	0.713
20180906	7	Control	C2	2	0.731	0.706	0.725	0.721
20180906	7	Control	C3	3	0.718	0.714	0.709	0.714
20180906	7	Control	C4	4	0.717	0.7	0.711	0.709
20180906	7	Control	C5	5	0.737	0.689	0.708	0.711
20180906	7	Control	C6	6	0.735	0.717	0.715	0.722
20180906	7	Stress	S1	1	0.712	0.671	0.694	0.692
20180906	7	Stress	S2	2	0.761	0.722	0.692	0.725
20180906	7	Stress	S3	3	0.755	0.716	0.712	0.728
20180906	7	Stress	S4	4	0.653	0.756	0.686	0.698
20180906	7	Stress	S5	5	0.712	0.702	0.692	0.702
20180906	7	Stress	S6	6	0.724	0.696	0.705	0.708
20180907	8	Control	C1	1	0.704	0.696	0.713	0.704
20180907	8	Control	C2	2	0.735	0.709	0.746	0.73
20180907	8	Control	C3	3	0.717	0.734	0.708	0.72
20180907	8	Control	C4	4	0.674	0.693	0.702	0.69
20180907	8	Control	C5	5	0.76	0.751	0.776	0.762
20180907	8	Control	C6	6	0.727	0.673	0.67	0.69
20180907	8	Stress	S1	1	0.668	0.611	0.685	0.655
20180907	8	Stress	S2	2	0.719	0.711	0.702	0.711
20180907	8	Stress	S3	3	0.709	0.679	0.699	0.696
20180907	8	Stress	S4	4	0.704	0.663	0.702	0.69
20180907	8	Stress	S5	5	0.687	0.618	0.672	0.659
20180907	8	Stress	S6	6	0.705	0.707	0.708	0.707
20180908	9	Control	C1	1	0.728	0.681	0.726	0.712
20180908	9	Control	C2	2	0.726	0.737	0.752	0.738
20180908	9	Control	C3	3	0.73	0.746	0.756	0.744
20180908	9	Control	C4	4	0.698	0.726	0.675	0.7
20180908	9	Control	C5	5	0.779	0.717	0.733	0.743
20180908	9	Control	C6	6	0.733	0.674	0.684	0.697
20180908	9	Stress	S1	1	0.725	0.715	0.739	0.726
20180908	9	Stress	S2	2	0.724	0.726	0.64	0.697
20180908	9	Stress	S3	3	0.711	0.714	0.737	0.721
20180908	9	Stress	S4	4	0.679	0.667	0.655	0.667
20180908	9	Stress	S5	5	0.694	0.667	0.687	0.683
20180908	9	Stress	S6	6	0.718	0.717	0.648	0.694
20180909	10	Control	C1	1	0.741	0.731	0.708	0.727
20180909	10	Control	C2	2	0.745	0.746	0.768	0.753
20180909	10	Control	C3	3	0.742	0.74	0.765	0.749
20180909	10	Control	C4	4	0.747	0.703	0.722	0.724
20180909	10	Control	C5	5	0.785	0.733	0.735	0.751
20180909	10	Control	C6	6	0.745	0.717	0.713	0.725
20180909	10	Stress	S1	1	0.642	0.739	0.727	0.703
20180909	10	Stress	S2	2	0.745	0.716	0.728	0.73
20180909	10	Stress	S3	3	0.718	0.716	0.738	0.724
20180909	10	Stress	S4	4	0.705	0.703	0.67	0.693
20180909	10	Stress	S5	5	0.709	0.735	0.683	0.709
20180909	10	Stress	S6	6	0.702	0.705	0.668	0.692

## Sheet: Brightness,Adults
Year	Days	Condition	Code	Brightness
2018	0	Control	C1	71.9788
2018	0	Control	C2	68.07
2018	0	Control	C3	68.07
2018	0	Control	C4	81.0992
2018	0	Control	C5	102.645
2018	0	Control	C6	70.6758
2018	0	Stress	S1	88.9167
2018	0	Stress	S2	83.705
2018	0	Stress	S3	71.9788
2018	0	Stress	S4	90.9188
2018	0	Stress	S5	83.705
2018	0	Stress	S6	75.8875
2018	1	Control	C1	75.8875
2018	1	Control	C2	68.07
2018	1	Control	C3	68.07
2018	1	Control	C4	83.705
2018	1	Control	C5	105.95
2018	1	Control	C6	73.2817
2018	1	Stress	S1	88.9167
2018	1	Stress	S2	83.705
2018	1	Stress	S3	75.8875
2018	1	Stress	S4	98.1325
2018	1	Stress	S5	88.9167
2018	1	Stress	S6	83.705
2018	2	Control	C1	83.705
2018	2	Control	C2	68.07
2018	2	Control	C3	68.07
2018	2	Control	C4	88.9167
2018	2	Control	C5	112.56
2018	2	Control	C6	78.4933
2018	2	Stress	S1	88.9167
2018	2	Stress	S2	83.705
2018	2	Stress	S3	83.705
2018	2	Stress	S4	112.56
2018	2	Stress	S5	99.34
2018	2	Stress	S6	99.34
2018	3	Control	C1	68.07
2018	3	Control	C2	68.07
2018	3	Control	C3	68.07
2018	3	Control	C4	88.9167
2018	3	Control	C5	125.78
2018	3	Control	C6	78.4933
2018	3	Stress	S1	139.943
2018	3	Stress	S2	83.705
2018	3	Stress	S3	83.705
2018	3	Stress	S4	139.943
2018	3	Stress	S5	139.943
2018	3	Stress	S6	119.17
2018	4	Control	C1	68.07
2018	4	Control	C2	68.07
2018	4	Control	C3	68.07
2018	4	Control	C4	88.9167
2018	4	Control	C5	125.78
2018	4	Control	C6	78.4933
2018	4	Stress	S1	139.943
2018	4	Stress	S2	99.34
2018	4	Stress	S3	99.34
2018	4	Stress	S4	153.163
2018	4	Stress	S5	139.943
2018	4	Stress	S6	119.17
2018	5	Control	C1	68.07
2018	5	Control	C2	68.07
2018	5	Control	C3	68.07
2018	5	Control	C4	94.1283
2018	5	Control	C5	125.78
2018	5	Control	C6	78.4933
2018	5	Stress	S1	146.553
2018	5	Stress	S2	99.34
2018	5	Stress	S3	109.255
2018	5	Stress	S4	153.163
2018	5	Stress	S5	139.943
2018	5	Stress	S6	119.17
2018	6	Control	C1	68.07
2018	6	Control	C2	68.07
2018	6	Control	C3	68.07
2018	6	Control	C4	99.34
2018	6	Control	C5	125.78
2018	6	Control	C6	78.4933
2018	6	Stress	S1	153.163
2018	6	Stress	S2	99.34
2018	6	Stress	S3	119.17
2018	6	Stress	S4	153.163
2018	6	Stress	S5	139.943
2018	6	Stress	S6	119.17
2018	7	Control	C1	83.705
2018	7	Control	C2	68.07
2018	7	Control	C3	68.07
2018	7	Control	C4	99.34
2018	7	Control	C5	125.78
2018	7	Control	C6	78.4933
2018	7	Stress	S1	153.163
2018	7	Stress	S2	112.56
2018	7	Stress	S3	125.78
2018	7	Stress	S4	158.997
2018	7	Stress	S5	161.453
2018	7	Stress	S6	139
2018	8	Control	C1	88.9167
2018	8	Control	C2	78.4933
2018	8	Control	C3	83.705
2018	8	Control	C4	99.34
2018	8	Control	C5	125.78
2018	8	Control	C6	88.9167
2018	8	Stress	S1	153.163
2018	8	Stress	S2	99.34
2018	8	Stress	S3	112.56
2018	8	Stress	S4	176.97
2018	8	Stress	S5	153.163
2018	8	Stress	S6	167.327
2018	9	Control	C1	88.9167
2018	9	Control	C2	78.4933
2018	9	Control	C3	83.705
2018	9	Control	C4	112.56
2018	9	Control	C5	112.56
2018	9	Control	C6	88.9167
2018	9	Stress	S1	153.163
2018	9	Stress	S2	99.34
2018	9	Stress	S3	139
2018	9	Stress	S4	185.84
2018	9	Stress	S5	139
2018	9	Stress	S6	167.327
2018	10	Control	C1	99.34
2018	10	Control	C2	68.07
2018	10	Control	C3	99.34
2018	10	Control	C4	112.56
2018	10	Control	C5	125.78
2018	10	Control	C6	88.9167
2018	10	Stress	S1	167.327
2018	10	Stress	S2	112.56
2018	10	Stress	S3	139
2018	10	Stress	S4	191.83
2018	10	Stress	S5	181.49
2018	10	Stress	S6	167.327

## Sheet: Sym,Chlo,Adults
Date	Days	Years	Condition	Colony	CellCm	aCell	c2Cell	TotalChlCell	aCm2	c2Cm2	TotalChlCm2
2018-08-31	First	2018	Control	C1	1.07206e+06	9.37387e-06	1.4936e-06	1.08675e-05	10.0493	1.60123	11.6506
2018-08-31	First	2018	Control	C2	506615	6.0085e-06	1.25129e-06	7.25979e-06	3.044	0.633922	3.67792
2018-08-31	First	2018	Control	C3	566036	7.49277e-06	3.19034e-06	1.06831e-05	4.24118	1.80585	6.04703
2018-08-31	First	2018	Control	C4	758425	7.85852e-06	2.26016e-06	1.01187e-05	5.9601	1.71416	7.67426
2018-08-31	First	2018	Control	C5	490195	9.25278e-06	3.6452e-06	1.2898e-05	4.53566	1.78686	6.32252
2018-08-31	First	2018	Control	C6	646273	6.58449e-06	1.66854e-06	8.25302e-06	4.25538	1.07833	5.33371
2028-09-10	End	2018	Stress	S1	328552	1.72409e-05	5.82271e-06	2.30636e-05	5.66452	1.91306	7.57758
2028-09-10	End	2018	Stress	S2	765924	6.9414e-06	2.5501e-06	9.4915e-06	5.31658	1.95318	7.26977
2028-09-10	End	2018	Stress	S3	335710	1.8942e-05	5.47935e-06	2.44214e-05	6.35904	1.83947	8.19851
2028-09-10	End	2018	Stress	S4	578713	7.89241e-06	4.55732e-06	1.24497e-05	4.56744	2.63738	7.20483
2028-09-10	End	2018	Stress	S5	219297	1.68563e-05	5.80415e-06	2.26604e-05	3.69653	1.27283	4.96936
2028-09-10	End	2018	Stress	S6	373535	1.53326e-05	6.70998e-06	2.20425e-05	5.72724	2.50641	8.23365
2028-09-10	End	2018	Control	C1	1.20255e+06	8.99075e-06	3.73319e-06	1.27239e-05	10.8118	4.48934	15.3011
2028-09-10	End	2018	Control	C2	1.25092e+06	7.02997e-06	2.84348e-06	9.87346e-06	8.79392	3.55697	12.3509
2028-09-10	End	2018	Control	C3	682950	6.45135e-06	3.12167e-06	9.57302e-06	4.40595	2.13195	6.5379
2028-09-10	End	2018	Control	C4	1.56224e+06	6.87322e-06	2.12384e-06	8.99706e-06	10.7376	3.31795	14.0556
2028-09-10	End	2018	Control	C5	1.17211e+06	3.28548e-06	4.38184e-06	7.66732e-06	3.85095	5.136	8.98696
2028-09-10	End	2018	Control	C6	1.1553e+06	6.21982e-06	1.91049e-06	8.13031e-06	7.18578	2.2072	9.39298

## Sheet: Eggs per bundel
Date	Condition	Code	No
2006-12-19	Nature	N1	19
2006-12-19	Nature	N1	19
2006-12-19	Nature	N1	14
2006-12-19	Nature	N1	15
2006-12-19	Nature	N2	15
2006-12-19	Nature	N2	10
2006-12-19	Nature	N2	12
2006-12-19	Nature	N2	11
2006-12-19	Nature	N3	15
2006-12-19	Nature	N3	15
2006-12-19	Nature	N3	22
2006-12-19	Nature	N3	15
2006-12-19	Nature	N4	14
2006-12-19	Nature	N4	11
2006-12-19	Nature	N4	11
2006-12-19	Nature	N4	14
2006-12-19	Nature	N5	15
2006-12-19	Nature	N5	15
2006-12-19	Nature	N5	17
2006-12-19	Nature	N5	21
2006-12-19	Nature	N6	19
2006-12-19	Nature	N6	26
2006-12-19	Nature	N6	16
2006-12-19	Nature	N6	18
2006-12-19	Control	C1	9
2006-12-19	Control	C1	10
2006-12-19	Control	C1	6
2006-12-19	Control	C1	14
2006-12-19	Control	C1	14
2006-12-19	Control	C1	9
2006-12-19	Control	C2	8
2006-12-19	Control	C2	9
2006-12-19	Control	C2	10
2006-12-19	Control	C2	12
2006-12-19	Control	C2	8
2006-12-19	Control	C2	10
2006-12-19	Control	C3	8
2006-12-19	Control	C3	7
2006-12-19	Control	C3	8
2006-12-19	Control	C3	12
2006-12-19	Control	C3	10
2006-12-19	Control	C3	10
2006-12-19	Control	C4	9
2006-12-19	Control	C4	13
2006-12-19	Control	C4	9
2006-12-19	Control	C4	13
2006-12-19	Control	C4	10
2006-12-19	Control	C4	9
2006-12-19	Control	C5	9
2006-12-19	Control	C5	7
2006-12-19	Control	C5	7
2006-12-19	Control	C5	9
2006-12-19	Control	C5	7
2006-12-19	Control	C5	6
2006-12-19	Control	C6	9
2006-12-19	Control	C6	7
2006-12-19	Control	C6	6
2006-12-19	Control	C6	9
2006-12-19	Control	C6	6
2006-12-19	Control	C6	8
2006-12-19	Stress	S1	9
2006-12-19	Stress	S1	10
2006-12-19	Stress	S1	14
2006-12-19	Stress	S1	15
2006-12-19	Stress	S1	14
2006-12-19	Stress	S1	10
2006-12-19	Stress	S2	14
2006-12-19	Stress	S2	11
2006-12-19	Stress	S2	12
2006-12-19	Stress	S2	12
2006-12-19	Stress	S2	10
2006-12-19	Stress	S2	12
2006-12-19	Stress	S4	13
2006-12-19	Stress	S4	9
2006-12-19	Stress	S4	10
2006-12-19	Stress	S4	9
2006-12-19	Stress	S4	9
2006-12-19	Stress	S4	14
2006-12-19	Stress	S6	8
2006-12-19	Stress	S6	9
2006-12-19	Stress	S6	10
2006-12-19	Stress	S6	5
2006-12-19	Stress	S6	9
2006-12-19	Stress	S6	11

## Sheet: Eggs volume
No	Condition	length.micro meter)	Volume.mm
1	Control	1116.4	0.676464
2	Control	1112.4	0.696001
3	Control	1090.88	0.650373
4	Control	1090.43	0.630385
5	Control	1140.02	0.752435
6	Control	1103.9	0.640002
7	Control	1200.06	0.851731
8	Control	1146	0.741552
9	Control	1308.34	1.15203
10	Control	1310.32	1.17619
11	Control	1064.05	0.535507
12	Control	1069.36	0.521581
13	Control	1123.8	0.675587
14	Control	1087.92	0.655988
15	Control	1093.93	0.683434
16	Control	1051.97	0.594672
17	Control	1128.26	0.574984
18	Control	1069.08	0.682956
19	Control	1202.88	0.524403
20	Control	1088.24	0.653
1	Stress	954.924	0.421164
2	Stress	906.715	0.360253
3	Stress	942.478	0.421747
4	Stress	966.671	0.443373
5	Stress	985.828	0.452085
6	Stress	1063.56	0.604329
7	Stress	996.018	0.498736
8	Stress	942.535	0.416019
9	Stress	1022.13	0.544742
10	Stress	957.183	0.433521
11	Stress	990.018	0.477564
12	Stress	903.374	0.34388
13	Stress	1048.4	0.528127
14	Stress	1052.89	0.573454
15	Stress	1098.41	0.663389
16	Stress	1008.07	0.523649
17	Stress	1145.54	0.736768
18	Stress	1183.2	0.833636
19	Stress	1045.72	0.5965
20	Stress	1122.4	0.591856
1	Nature	1382.16	0.93184
2	Nature	1390.87	0.820974
3	Nature	1344.7	0.889657
4	Nature	1250.32	0.811011
5	Nature	1378.29	0.787864
6	Nature	1119.54	0.600073
7	Nature	1210.31	0.637457
8	Nature	1116.47	0.664956
9	Nature	1131.12	0.721569
10	Nature	1254.7	0.621223
11	Nature	1308.06	1.12947
12	Nature	1378.39	1.12095
13	Nature	1380.12	1.20857
14	Nature	1290.77	1.05998
15	Nature	1428.05	1.24821
16	Nature	1357.04	1.26698
17	Nature	1399.24	1.05721
18	Nature	1417.83	1.15566
19	Nature	1296.35	1.06881
20	Nature	1380.12	1.10381

## Sheet: Survival larvae
Fragment	Condition	Code	Replicates	Day	No	Censor					Fragment	Condition	Code	Replicates	Day	Survived larvae	Total larvae	Mortality	Survival	Mean	Std	SE
Nature	Control	NC	N1	1	1	0					Nature	Control	NC	N1	21	7	65	10.7692	89.2308
Nature	Control	NC	N1	1	2	0					Nature	Control	NC	N2	21	7	60	11.6667	88.3333
Nature	Control	NC	N1	1	3	0					Nature	Control	NC	N3	21	13	68	19.1176	80.8824
Nature	Control	NC	N1	1	4	0					Nature	Control	NC	N4	21	4	61	6.55738	93.4426
Nature	Control	NC	N1	1	5	0					Nature	Control	NC	N5	21	6	50	12	88	87.9778	4.52511	2.0292
Nature	Control	NC	N1	1	6	0					Control	Control	CC	C1	21	8	50	16	84
Nature	Control	NC	N1	1	7	0					Control	Control	CC	C2	21	4	32	12.5	87.5
Nature	Control	NC	N1	1	8	0					Control	Control	CC	C3	21	5	52	9.61538	90.3846
Nature	Control	NC	N1	1	9	0					Control	Control	CC	C4	21	9	38	23.6842	76.3158
Nature	Control	NC	N1	1	10	0					Control	Control	CC	C5	21	5	46	10.8696	89.1304	85.4662	5.64875	2.53307
Nature	Control	NC	N1	1	11	0					Stress	Control	CS	S1	21	6	14	42.8571	57.1429
Nature	Control	NC	N1	1	12	0					Stress	Control	CS	S2	21	7	47	14.8936	85.1064
Nature	Control	NC	N1	1	13	0					Stress	Control	CS	S4	21	7	56	12.5	87.5
Nature	Control	NC	N1	1	14	0					Stress	Control	CS	S5	21	50	77	64.9351	35.0649	66.2035	24.917	12.4585
Nature	Control	NC	N1	1	15	0					Nature	Stress	NS	N1	21	10	79	12.6582	87.3418
Nature	Control	NC	N1	1	16	0					Nature	Stress	NS	N2	21	6	64	9.375	90.625
Nature	Control	NC	N1	1	17	0					Nature	Stress	NS	N3	21	1	66	1.51515	98.4848
Nature	Control	NC	N1	1	18	0					Nature	Stress	NS	N4	21	12	70	17.1429	82.8571
Nature	Control	NC	N1	1	19	0					Nature	Stress	NS	N5	21	11	69	15.942	84.058	88.6733	6.26453	2.80921
Nature	Control	NC	N1	1	20	0					Control	Stress	SC	C1	21	9	66	13.6364	86.3636
Nature	Control	NC	N1	1	21	0					Control	Stress	SC	C2	21	7	67	10.4478	89.5522
Nature	Control	NC	N1	1	22	0					Control	Stress	SC	C3	21	8	71	11.2676	88.7324
Nature	Control	NC	N1	1	23	0					Control	Stress	SC	C4	21	20	68	29.4118	70.5882
Nature	Control	NC	N1	1	24	0					Control	Stress	SC	C5	21	0	72	0	100	87.0473	10.586	4.74709
Nature	Control	NC	N1	1	25	0					Stress	Stress	SS	S1	21	19	62	30.6452	69.3548
Nature	Control	NC	N1	1	26	0					Stress	Stress	SS	S2	21	3	63	4.7619	95.2381
Nature	Control	NC	N1	1	27	0					Stress	Stress	SS	S3	21	17	57	29.8246	70.1754
Nature	Control	NC	N1	1	28	0					Stress	Stress	SS	S4	21	13	20	65	35
Nature	Control	NC	N1	1	29	0					Stress	Stress	SS	S5	21	5	61	8.19672	91.8033	72.3143	24.0365	10.7787
Nature	Control	NC	N1	1	30	0
Nature	Control	NC	N1	1	31	0
Nature	Control	NC	N1	1	32	0
Nature	Control	NC	N1	1	33	0
Nature	Control	NC	N1	1	34	0
Nature	Control	NC	N1	1	35	0
Nature	Control	NC	N1	1	36	0
Nature	Control	NC	N1	1	37	0
Nature	Control	NC	N1	1	38	0
Nature	Control	NC	N1	1	39	0
Nature	Control	NC	N1	1	40	0
Nature	Control	NC	N1	1	41	0
Nature	Control	NC	N1	1	42	0
Nature	Control	NC	N1	1	43	0
Nature	Control	NC	N1	1	44	0
Nature	Control	NC	N1	1	45	0
Nature	Control	NC	N1	1	46	0
Nature	Control	NC	N1	1	47	0
Nature	Control	NC	N1	1	48	0
Nature	Control	NC	N1	1	49	0
Nature	Control	NC	N1	1	50	0
Nature	Control	NC	N1	1	51	0
Nature	Control	NC	N1	1	52	0
Nature	Control	NC	N1	1	53	0
Nature	Control	NC	N1	1	54	0
Nature	Control	NC	N1	1	55	0
Nature	Control	NC	N1	1	56	0
Nature	Control	NC	N1	1	57	0
Nature	Control	NC	N1	1	58	0
Nature	Control	NC	N1	1	59	0
Nature	Control	NC	N1	1	60	0
Nature	Control	NC	N1	1	61	0
Nature	Control	NC	N1	1	62	0
Nature	Control	NC	N1	1	63	0
Nature	Control	NC	N1	1	64	0
Nature	Control	NC	N1	1	65	0
Nature	Control	NC	N1	2	1	1
Nature	Control	NC	N1	2	2	1
Nature	Control	NC	N1	2	3	0
Nature	Control	NC	N1	2	4	0
Nature	Control	NC	N1	2	5	0
Nature	Control	NC	N1	2	6	0
Nature	Control	NC	N1	2	7	0
Nature	Control	NC	N1	2	8	0
Nature	Control	NC	N1	2	9	0
Nature	Control	NC	N1	2	10	0
Nature	Control	NC	N1	2	11	0
Nature	Control	NC	N1	2	12	0
Nature	Control	NC	N1	2	13	0
Nature	Control	NC	N1	2	14	0
Nature	Control	NC	N1	2	15	0
Nature	Control	NC	N1	2	16	0
Nature	Control	NC	N1	2	17	0
Nature	Control	NC	N1	2	18	0
Nature	Control	NC	N1	2	19	0
Nature	Control	NC	N1	2	20	0
Nature	Control	NC	N1	2	21	0
Nature	Control	NC	N1	2	22	0
Nature	Control	NC	N1	2	23	0
Nature	Control	NC	N1	2	24	0
Nature	Control	NC	N1	2	25	0
Nature	Control	NC	N1	2	26	0
Nature	Control	NC	N1	2	27	0
Nature	Control	NC	N1	2	28	0
Nature	Control	NC	N1	2	29	0
Nature	Control	NC	N1	2	30	0
Nature	Control	NC	N1	2	31	0
Nature	Control	NC	N1	2	32	0
Nature	Control	NC	N1	2	33	0
Nature	Control	NC	N1	2	34	0
Nature	Control	NC	N1	2	35	0
Nature	Control	NC	N1	2	36	0
Nature	Control	NC	N1	2	37	0
Nature	Control	NC	N1	2	38	0
Nature	Control	NC	N1	2	39	0
Nature	Control	NC	N1	2	40	0
Nature	Control	NC	N1	2	41	0
Nature	Control	NC	N1	2	42	0
Nature	Control	NC	N1	2	43	0
Nature	Control	NC	N1	2	44	0
Nature	Control	NC	N1	2	45	0
Nature	Control	NC	N1	2	46	0
Nature	Control	NC	N1	2	47	0
Nature	Control	NC	N1	2	48	0
Nature	Control	NC	N1	2	49	0
Nature	Control	NC	N1	2	50	0
Nature	Control	NC	N1	2	51	0
Nature	Control	NC	N1	2	52	0
Nature	Control	NC	N1	2	53	0
Nature	Control	NC	N1	2	54	0
Nature	Control	NC	N1	2	55	0
Nature	Control	NC	N1	2	56	0
Nature	Control	NC	N1	2	57	0
Nature	Control	NC	N1	2	58	0
Nature	Control	NC	N1	2	59	0
Nature	Control	NC	N1	2	60	0
Nature	Control	NC	N1	2	61	0
Nature	Control	NC	N1	2	62	0
Nature	Control	NC	N1	2	63	0
Nature	Control	NC	N1	2	64	0
Nature	Control	NC	N1	2	65	0
Nature	Control	NC	N1	3	1	1
Nature	Control	NC	N1	3	2	1
Nature	Control	NC	N1	3	3	1
Nature	Control	NC	N1	3	4	1
Nature	Control	NC	N1	3	5	1
Nature	Control	NC	N1	3	6	0
Nature	Control	NC	N1	3	7	0
Nature	Control	NC	N1	3	8	0
Nature	Control	NC	N1	3	9	0
Nature	Control	NC	N1	3	10	0
Nature	Control	NC	N1	3	11	0
Nature	Control	NC	N1	3	12	0
Nature	Control	NC	N1	3	13	0
Nature	Control	NC	N1	3	14	0
Nature	Control	NC	N1	3	15	0
Nature	Control	NC	N1	3	16	0
Nature	Control	NC	N1	3	17	0
Nature	Control	NC	N1	3	18	0
Nature	Control	NC	N1	3	19	0
Nature	Control	NC	N1	3	20	0
Nature	Control	NC	N1	3	21	0
Nature	Control	NC	N1	3	22	0
Nature	Control	NC	N1	3	23	0
Nature	Control	NC	N1	3	24	0
Nature	Control	NC	N1	3	25	0
Nature	Control	NC	N1	3	26	0
Nature	Control	NC	N1	3	27	0
Nature	Control	NC	N1	3	28	0
Nature	Control	NC	N1	3	29	0
Nature	Control	NC	N1	3	30	0
Nature	Control	NC	N1	3	31	0
Nature	Control	NC	N1	3	32	0
Nature	Control	NC	N1	3	33	0
Nature	Control	NC	N1	3	34	0
Nature	Control	NC	N1	3	35	0
Nature	Control	NC	N1	3	36	0
Nature	Control	NC	N1	3	37	0
Nature	Control	NC	N1	3	38	0
Nature	Control	NC	N1	3	39	0
Nature	Control	NC	N1	3	40	0
Nature	Control	NC	N1	3	41	0
Nature	Control	NC	N1	3	42	0
Nature	Control	NC	N1	3	43	0
Nature	Control	NC	N1	3	44	0
Nature	Control	NC	N1	3	45	0
Nature	Control	NC	N1	3	46	0
Nature	Control	NC	N1	3	47	0
Nature	Control	NC	N1	3	48	0
Nature	Control	NC	N1	3	49	0
Nature	Control	NC	N1	3	50	0
Nature	Control	NC	N1	3	51	0
Nature	Control	NC	N1	3	52	0
Nature	Control	NC	N1	3	53	0
Nature	Control	NC	N1	3	54	0
Nature	Control	NC	N1	3	55	0
Nature	Control	NC	N1	3	56	0
Nature	Control	NC	N1	3	57	0
Nature	Control	NC	N1	3	58	0
Nature	Control	NC	N1	3	59	0
Nature	Control	NC	N1	3	60	0
Nature	Control	NC	N1	3	61	0
Nature	Control	NC	N1	3	62	0
Nature	Control	NC	N1	3	63	0
Nature	Control	NC	N1	3	64	0
Nature	Control	NC	N1	3	65	0
Nature	Control	NC	N1	4	1	1
Nature	Control	NC	N1	4	2	1
Nature	Control	NC	N1	4	3	1
Nature	Control	NC	N1	4	4	1
Nature	Control	NC	N1	4	5	1
Nature	Control	NC	N1	4	6	0
Nature	Control	NC	N1	4	7	0
Nature	Control	NC	N1	4	8	0
Nature	Control	NC	N1	4	9	0
Nature	Control	NC	N1	4	10	0
Nature	Control	NC	N1	4	11	0
Nature	Control	NC	N1	4	12	0
Nature	Control	NC	N1	4	13	0
Nature	Control	NC	N1	4	14	0
Nature	Control	NC	N1	4	15	0
Nature	Control	NC	N1	4	16	0
Nature	Control	NC	N1	4	17	0
Nature	Control	NC	N1	4	18	0
Nature	Control	NC	N1	4	19	0
Nature	Control	NC	N1	4	20	0
Nature	Control	NC	N1	4	21	0
Nature	Control	NC	N1	4	22	0
Nature	Control	NC	N1	4	23	0
Nature	Control	NC	N1	4	24	0
Nature	Control	NC	N1	4	25	0
Nature	Control	NC	N1	4	26	0
Nature	Control	NC	N1	4	27	0
Nature	Control	NC	N1	4	28	0
Nature	Control	NC	N1	4	29	0
Nature	Control	NC	N1	4	30	0
Nature	Control	NC	N1	4	31	0
Nature	Control	NC	N1	4	32	0
Nature	Control	NC	N1	4	33	0
Nature	Control	NC	N1	4	34	0
Nature	Control	NC	N1	4	35	0
Nature	Control	NC	N1	4	36	0
Nature	Control	NC	N1	4	37	0
Nature	Control	NC	N1	4	38	0
Nature	Control	NC	N1	4	39	0
Nature	Control	NC	N1	4	40	0
Nature	Control	NC	N1	4	41	0
Nature	Control	NC	N1	4	42	0
Nature	Control	NC	N1	4	43	0
Nature	Control	NC	N1	4	44	0
Nature	Control	NC	N1	4	45	0
Nature	Control	NC	N1	4	46	0
Nature	Control	NC	N1	4	47	0
Nature	Control	NC	N1	4	48	0
Nature	Control	NC	N1	4	49	0
Nature	Control	NC	N1	4	50	0
Nature	Control	NC	N1	4	51	0
Nature	Control	NC	N1	4	52	0
Nature	Control	NC	N1	4	53	0
Nature	Control	NC	N1	4	54	0
Nature	Control	NC	N1	4	55	0
Nature	Control	NC	N1	4	56	0
Nature	Control	NC	N1	4	57	0
Nature	Control	NC	N1	4	58	0
Nature	Control	NC	N1	4	59	0
Nature	Control	NC	N1	4	60	0
Nature	Control	NC	N1	4	61	0
Nature	Control	NC	N1	4	62	0
Nature	Control	NC	N1	4	63	0
Nature	Control	NC	N1	4	64	0
Nature	Control	NC	N1	4	65	0
Nature	Control	NC	N1	5	1	1
Nature	Control	NC	N1	5	2	1
Nature	Control	NC	N1	5	3	1
Nature	Control	NC	N1	5	4	1
Nature	Control	NC	N1	5	5	1
Nature	Control	NC	N1	5	6	0
Nature	Control	NC	N1	5	7	0
Nature	Control	NC	N1	5	8	0
Nature	Control	NC	N1	5	9	0
Nature	Control	NC	N1	5	10	0
Nature	Control	NC	N1	5	11	0
Nature	Control	NC	N1	5	12	0
Nature	Control	NC	N1	5	13	0
Nature	Control	NC	N1	5	14	0
Nature	Control	NC	N1	5	15	0
Nature	Control	NC	N1	5	16	0
Nature	Control	NC	N1	5	17	0
Nature	Control	NC	N1	5	18	0
Nature	Control	NC	N1	5	19	0
Nature	Control	NC	N1	5	20	0
Nature	Control	NC	N1	5	21	0
Nature	Control	NC	N1	5	22	0
Nature	Control	NC	N1	5	23	0
Nature	Control	NC	N1	5	24	0
Nature	Control	NC	N1	5	25	0
Nature	Control	NC	N1	5	26	0
Nature	Control	NC	N1	5	27	0
Nature	Control	NC	N1	5	28	0
Nature	Control	NC	N1	5	29	0
Nature	Control	NC	N1	5	30	0
Nature	Control	NC	N1	5	31	0
Nature	Control	NC	N1	5	32	0
Nature	Control	NC	N1	5	33	0
Nature	Control	NC	N1	5	34	0
Nature	Control	NC	N1	5	35	0
Nature	Control	NC	N1	5	36	0
Nature	Control	NC	N1	5	37	0
Nature	Control	NC	N1	5	38	0
Nature	Control	NC	N1	5	39	0
Nature	Control	NC	N1	5	40	0
Nature	Control	NC	N1	5	41	0
Nature	Control	NC	N1	5	42	0
Nature	Control	NC	N1	5	43	0
Nature	Control	NC	N1	5	44	0
Nature	Control	NC	N1	5	45	0
Nature	Control	NC	N1	5	46	0
Nature	Control	NC	N1	5	47	0
Nature	Control	NC	N1	5	48	0
Nature	Control	NC	N1	5	49	0
Nature	Control	NC	N1	5	50	0
Nature	Control	NC	N1	5	51	0
Nature	Control	NC	N1	5	52	0
Nature	Control	NC	N1	5	53	0
Nature	Control	NC	N1	5	54	0
Nature	Control	NC	N1	5	55	0
Nature	Control	NC	N1	5	56	0
Nature	Control	NC	N1	5	57	0
Nature	Control	NC	N1	5	58	0
Nature	Control	NC	N1	5	59	0
Nature	Control	NC	N1	5	60	0
Nature	Control	NC	N1	5	61	0
Nature	Control	NC	N1	5	62	0
Nature	Control	NC	N1	5	63	0
Nature	Control	NC	N1	5	64	0
Nature	Control	NC	N1	5	65	0
Nature	Control	NC	N1	6	1	1
Nature	Control	NC	N1	6	2	1
Nature	Control	NC	N1	6	3	1
Nature	Control	NC	N1	6	4	1
Nature	Control	NC	N1	6	5	1
Nature	Control	NC	N1	6	6	1
Nature	Control	NC	N1	6	7	0
Nature	Control	NC	N1	6	8	0
Nature	Control	NC	N1	6	9	0
Nature	Control	NC	N1	6	10	0
Nature	Control	NC	N1	6	11	0
Nature	Control	NC	N1	6	12	0
Nature	Control	NC	N1	6	13	0
Nature	Control	NC	N1	6	14	0
Nature	Control	NC	N1	6	15	0
Nature	Control	NC	N1	6	16	0
Nature	Control	NC	N1	6	17	0
Nature	Control	NC	N1	6	18	0
Nature	Control	NC	N1	6	19	0
Nature	Control	NC	N1	6	20	0
Nature	Control	NC	N1	6	21	0
Nature	Control	NC	N1	6	22	0
Nature	Control	NC	N1	6	23	0
Nature	Control	NC	N1	6	24	0
Nature	Control	NC	N1	6	25	0
Nature	Control	NC	N1	6	26	0
Nature	Control	NC	N1	6	27	0
Nature	Control	NC	N1	6	28	0
Nature	Control	NC	N1	6	29	0
Nature	Control	NC	N1	6	30	0
Nature	Control	NC	N1	6	31	0
Nature	Control	NC	N1	6	32	0
Nature	Control	NC	N1	6	33	0
Nature	Control	NC	N1	6	34	0
Nature	Control	NC	N1	6	35	0
Nature	Control	NC	N1	6	36	0
Nature	Control	NC	N1	6	37	0
Nature	Control	NC	N1	6	38	0
Nature	Control	NC	N1	6	39	0
Nature	Control	NC	N1	6	40	0
Nature	Control	NC	N1	6	41	0
Nature	Control	NC	N1	6	42	0
Nature	Control	NC	N1	6	43	0
Nature	Control	NC	N1	6	44	0
Nature	Control	NC	N1	6	45	0
Nature	Control	NC	N1	6	46	0
Nature	Control	NC	N1	6	47	0
Nature	Control	NC	N1	6	48	0
Nature	Control	NC	N1	6	49	0
Nature	Control	NC	N1	6	50	0
Nature	Control	NC	N1	6	51	0
Nature	Control	NC	N1	6	52	0
Nature	Control	NC	N1	6	53	0
Nature	Control	NC	N1	6	54	0
Nature	Control	NC	N1	6	55	0
Nature	Control	NC	N1	6	56	0
Nature	Control	NC	N1	6	57	0
Nature	Control	NC	N1	6	58	0
Nature	Control	NC	N1	6	59	0
Nature	Control	NC	N1	6	60	0
Nature	Control	NC	N1	6	61	0
Nature	Control	NC	N1	6	62	0
Nature	Control	NC	N1	6	63	0
Nature	Control	NC	N1	6	64	0
Nature	Control	NC	N1	6	65	0
Nature	Control	NC	N1	7	1	1
Nature	Control	NC	N1	7	2	1
Nature	Control	NC	N1	7	3	1
Nature	Control	NC	N1	7	4	1
Nature	Control	NC	N1	7	5	1
Nature	Control	NC	N1	7	6	1
Nature	Control	NC	N1	7	7	0
Nature	Control	NC	N1	7	8	0
Nature	Control	NC	N1	7	9	0
Nature	Control	NC	N1	7	10	0
Nature	Control	NC	N1	7	11	0
Nature	Control	NC	N1	7	12	0
Nature	Control	NC	N1	7	13	0
Nature	Control	NC	N1	7	14	0
Nature	Control	NC	N1	7	15	0
Nature	Control	NC	N1	7	16	0
Nature	Control	NC	N1	7	17	0
Nature	Control	NC	N1	7	18	0
Nature	Control	NC	N1	7	19	0
Nature	Control	NC	N1	7	20	0
Nature	Control	NC	N1	7	21	0
Nature	Control	NC	N1	7	22	0
Nature	Control	NC	N1	7	23	0
Nature	Control	NC	N1	7	24	0
Nature	Control	NC	N1	7	25	0
Nature	Control	NC	N1	7	26	0
Nature	Control	NC	N1	7	27	0
Nature	Control	NC	N1	7	28	0
Nature	Control	NC	N1	7	29	0
Nature	Control	NC	N1	7	30	0
Nature	Control	NC	N1	7	31	0
Nature	Control	NC	N1	7	32	0
Nature	Control	NC	N1	7	33	0
Nature	Control	NC	N1	7	34	0
Nature	Control	NC	N1	7	35	0
Nature	Control	NC	N1	7	36	0
Nature	Control	NC	N1	7	37	0
Nature	Control	NC	N1	7	38	0
Nature	Control	NC	N1	7	39	0
Nature	Control	NC	N1	7	40	0
Nature	Control	NC	N1	7	41	0
Nature	Control	NC	N1	7	42	0
Nature	Control	NC	N1	7	43	0
Nature	Control	NC	N1	7	44	0
Nature	Control	NC	N1	7	45	0
Nature	Control	NC	N1	7	46	0
Nature	Control	NC	N1	7	47	0
Nature	Control	NC	N1	7	48	0
Nature	Control	NC	N1	7	49	0
Nature	Control	NC	N1	7	50	0
Nature	Control	NC	N1	7	51	0
Nature	Control	NC	N1	7	52	0
Nature	Control	NC	N1	7	53	0
Nature	Control	NC	N1	7	54	0
Nature	Control	NC	N1	7	55	0
Nature	Control	NC	N1	7	56	0
Nature	Control	NC	N1	7	57	0
Nature	Control	NC	N1	7	58	0
Nature	Control	NC	N1	7	59	0
Nature	Control	NC	N1	7	60	0
Nature	Control	NC	N1	7	61	0
Nature	Control	NC	N1	7	62	0
Nature	Control	NC	N1	7	63	0
Nature	Control	NC	N1	7	64	0
Nature	Control	NC	N1	7	65	0
Nature	Control	NC	N1	8	1	1
Nature	Control	NC	N1	8	2	1
Nature	Control	NC	N1	8	3	1
Nature	Control	NC	N1	8	4	1
Nature	Control	NC	N1	8	5	1
Nature	Control	NC	N1	8	6	1
Nature	Control	NC	N1	8	7	0
Nature	Control	NC	N1	8	8	0
Nature	Control	NC	N1	8	9	0
Nature	Control	NC	N1	8	10	0
Nature	Control	NC	N1	8	11	0
Nature	Control	NC	N1	8	12	0
Nature	Control	NC	N1	8	13	0
Nature	Control	NC	N1	8	14	0
Nature	Control	NC	N1	8	15	0
Nature	Control	NC	N1	8	16	0
Nature	Control	NC	N1	8	17	0
Nature	Control	NC	N1	8	18	0
Nature	Control	NC	N1	8	19	0
Nature	Control	NC	N1	8	20	0
Nature	Control	NC	N1	8	21	0
Nature	Control	NC	N1	8	22	0
Nature	Control	NC	N1	8	23	0
Nature	Control	NC	N1	8	24	0
Nature	Control	NC	N1	8	25	0
Nature	Control	NC	N1	8	26	0
Nature	Control	NC	N1	8	27	0
Nature	Control	NC	N1	8	28	0
Nature	Control	NC	N1	8	29	0
Nature	Control	NC	N1	8	30	0
Nature	Control	NC	N1	8	31	0
Nature	Control	NC	N1	8	32	0
Nature	Control	NC	N1	8	33	0
Nature	Control	NC	N1	8	34	0
Nature	Control	NC	N1	8	35	0
Nature	Control	NC	N1	8	36	0
Nature	Control	NC	N1	8	37	0
Nature	Control	NC	N1	8	38	0
Nature	Control	NC	N1	8	39	0
Nature	Control	NC	N1	8	40	0
Nature	Control	NC	N1	8	41	0
Nature	Control	NC	N1	8	42	0
Nature	Control	NC	N1	8	43	0
Nature	Control	NC	N1	8	44	0
Nature	Control	NC	N1	8	45	0
Nature	Control	NC	N1	8	46	0
Nature	Control	NC	N1	8	47	0
Nature	Control	NC	N1	8	48	0
Nature	Control	NC	N1	8	49	0
Nature	Control	NC	N1	8	50	0
Nature	Control	NC	N1	8	51	0
Nature	Control	NC	N1	8	52	0
Nature	Control	NC	N1	8	53	0
Nature	Control	NC	N1	8	54	0
Nature	Control	NC	N1	8	55	0
Nature	Control	NC	N1	8	56	0
Nature	Control	NC	N1	8	57	0
Nature	Control	NC	N1	8	58	0
Nature	Control	NC	N1	8	59	0
Nature	Control	NC	N1	8	60	0
Nature	Control	NC	N1	8	61	0
Nature	Control	NC	N1	8	62	0
Nature	Control	NC	N1	8	63	0
Nature	Control	NC	N1	8	64	0
Nature	Control	NC	N1	8	65	0
Nature	Control	NC	N1	9	1	1
Nature	Control	NC	N1	9	2	1
Nature	Control	NC	N1	9	3	1
Nature	Control	NC	N1	9	4	1
Nature	Control	NC	N1	9	5	1
Nature	Control	NC	N1	9	6	1
Nature	Control	NC	N1	9	7	0
Nature	Control	NC	N1	9	8	0
Nature	Control	NC	N1	9	9	0
Nature	Control	NC	N1	9	10	0
Nature	Control	NC	N1	9	11	0
Nature	Control	NC	N1	9	12	0
Nature	Control	NC	N1	9	13	0
Nature	Control	NC	N1	9	14	0
Nature	Control	NC	N1	9	15	0
Nature	Control	NC	N1	9	16	0
Nature	Control	NC	N1	9	17	0
Nature	Control	NC	N1	9	18	0
Nature	Control	NC	N1	9	19	0
Nature	Control	NC	N1	9	20	0
Nature	Control	NC	N1	9	21	0
Nature	Control	NC	N1	9	22	0
Nature	Control	NC	N1	9	23	0
Nature	Control	NC	N1	9	24	0
Nature	Control	NC	N1	9	25	0
Nature	Control	NC	N1	9	26	0
Nature	Control	NC	N1	9	27	0
Nature	Control	NC	N1	9	28	0
Nature	Control	NC	N1	9	29	0
Nature	Control	NC	N1	9	30	0
Nature	Control	NC	N1	9	31	0
Nature	Control	NC	N1	9	32	0
Nature	Control	NC	N1	9	33	0
Nature	Control	NC	N1	9	34	0
Nature	Control	NC	N1	9	35	0
Nature	Control	NC	N1	9	36	0
Nature	Control	NC	N1	9	37	0
Nature	Control	NC	N1	9	38	0
Nature	Control	NC	N1	9	39	0
Nature	Control	NC	N1	9	40	0
Nature	Control	NC	N1	9	41	0
Nature	Control	NC	N1	9	42	0
Nature	Control	NC	N1	9	43	0
Nature	Control	NC	N1	9	44	0
Nature	Control	NC	N1	9	45	0
Nature	Control	NC	N1	9	46	0
Nature	Control	NC	N1	9	47	0
Nature	Control	NC	N1	9	48	0
Nature	Control	NC	N1	9	49	0
Nature	Control	NC	N1	9	50	0
Nature	Control	NC	N1	9	51	0
Nature	Control	NC	N1	9	52	0
Nature	Control	NC	N1	9	53	0
Nature	Control	NC	N1	9	54	0
Nature	Control	NC	N1	9	55	0
Nature	Control	NC	N1	9	56	0
Nature	Control	NC	N1	9	57	0
Nature	Control	NC	N1	9	58	0
Nature	Control	NC	N1	9	59	0
Nature	Control	NC	N1	9	60	0
Nature	Control	NC	N1	9	61	0
Nature	Control	NC	N1	9	62	0
Nature	Control	NC	N1	9	63	0
Nature	Control	NC	N1	9	64	0
Nature	Control	NC	N1	9	65	0
Nature	Control	NC	N1	10	1	1
Nature	Control	NC	N1	10	2	1
Nature	Control	NC	N1	10	3	1
Nature	Control	NC	N1	10	4	1
Nature	Control	NC	N1	10	5	1
Nature	Control	NC	N1	10	6	1
Nature	Control	NC	N1	10	7	0
Nature	Control	NC	N1	10	8	0
Nature	Control	NC	N1	10	9	0
Nature	Control	NC	N1	10	10	0
Nature	Control	NC	N1	10	11	0
Nature	Control	NC	N1	10	12	0
Nature	Control	NC	N1	10	13	0
Nature	Control	NC	N1	10	14	0
Nature	Control	NC	N1	10	15	0
Nature	Control	NC	N1	10	16	0
Nature	Control	NC	N1	10	17	0
Nature	Control	NC	N1	10	18	0
Nature	Control	NC	N1	10	19	0
Nature	Control	NC	N1	10	20	0
Nature	Control	NC	N1	10	21	0
Nature	Control	NC	N1	10	22	0
Nature	Control	NC	N1	10	23	0
Nature	Control	NC	N1	10	24	0
Nature	Control	NC	N1	10	25	0
Nature	Control	NC	N1	10	26	0
Nature	Control	NC	N1	10	27	0
Nature	Control	NC	N1	10	28	0
Nature	Control	NC	N1	10	29	0
Nature	Control	NC	N1	10	30	0
Nature	Control	NC	N1	10	31	0
Nature	Control	NC	N1	10	32	0
Nature	Control	NC	N1	10	33	0
Nature	Control	NC	N1	10	34	0
Nature	Control	NC	N1	10	35	0
Nature	Control	NC	N1	10	36	0
Nature	Control	NC	N1	10	37	0
Nature	Control	NC	N1	10	38	0
Nature	Control	NC	N1	10	39	0
Nature	Control	NC	N1	10	40	0
Nature	Control	NC	N1	10	41	0
Nature	Control	NC	N1	10	42	0
Nature	Control	NC	N1	10	43	0
Nature	Control	NC	N1	10	44	0
Nature	Control	NC	N1	10	45	0
Nature	Control	NC	N1	10	46	0
Nature	Control	NC	N1	10	47	0
Nature	Control	NC	N1	10	48	0
Nature	Control	NC	N1	10	49	0
Nature	Control	NC	N1	10	50	0
Nature	Control	NC	N1	10	51	0
Nature	Control	NC	N1	10	52	0
Nature	Control	NC	N1	10	53	0
Nature	Control	NC	N1	10	54	0
Nature	Control	NC	N1	10	55	0
Nature	Control	NC	N1	10	56	0
Nature	Control	NC	N1	10	57	0
Nature	Control	NC	N1	10	58	0
Nature	Control	NC	N1	10	59	0
Nature	Control	NC	N1	10	60	0
Nature	Control	NC	N1	10	61	0
Nature	Control	NC	N1	10	62	0
Nature	Control	NC	N1	10	63	0
Nature	Control	NC	N1	10	64	0
Nature	Control	NC	N1	10	65	0
Nature	Control	NC	N1	11	1	1
Nature	Control	NC	N1	11	2	1
Nature	Control	NC	N1	11	3	1
Nature	Control	NC	N1	11	4	1
Nature	Control	NC	N1	11	5	1
Nature	Control	NC	N1	11	6	1
Nature	Control	NC	N1	11	7	0
Nature	Control	NC	N1	11	8	0
Nature	Control	NC	N1	11	9	0
Nature	Control	NC	N1	11	10	0
Nature	Control	NC	N1	11	11	0
Nature	Control	NC	N1	11	12	0
Nature	Control	NC	N1	11	13	0
Nature	Control	NC	N1	11	14	0
Nature	Control	NC	N1	11	15	0
Nature	Control	NC	N1	11	16	0
Nature	Control	NC	N1	11	17	0
Nature	Control	NC	N1	11	18	0
Nature	Control	NC	N1	11	19	0
Nature	Control	NC	N1	11	20	0
Nature	Control	NC	N1	11	21	0
Nature	Control	NC	N1	11	22	0
Nature	Control	NC	N1	11	23	0
Nature	Control	NC	N1	11	24	0
Nature	Control	NC	N1	11	25	0
Nature	Control	NC	N1	11	26	0
Nature	Control	NC	N1	11	27	0
Nature	Control	NC	N1	11	28	0
Nature	Control	NC	N1	11	29	0
Nature	Control	NC	N1	11	30	0
Nature	Control	NC	N1	11	31	0
Nature	Control	NC	N1	11	32	0
Nature	Control	NC	N1	11	33	0
Nature	Control	NC	N1	11	34	0
Nature	Control	NC	N1	11	35	0
Nature	Control	NC	N1	11	36	0
Nature	Control	NC	N1	11	37	0
Nature	Control	NC	N1	11	38	0
Nature	Control	NC	N1	11	39	0
Nature	Control	NC	N1	11	40	0
Nature	Control	NC	N1	11	41	0
Nature	Control	NC	N1	11	42	0
Nature	Control	NC	N1	11	43	0
Nature	Control	NC	N1	11	44	0
Nature	Control	NC	N1	11	45	0
Nature	Control	NC	N1	11	46	0
Nature	Control	NC	N1	11	47	0
Nature	Control	NC	N1	11	48	0
Nature	Control	NC	N1	11	49	0
Nature	Control	NC	N1	11	50	0
Nature	Control	NC	N1	11	51	0
Nature	Control	NC	N1	11	52	0
Nature	Control	NC	N1	11	53	0
Nature	Control	NC	N1	11	54	0
Nature	Control	NC	N1	11	55	0
Nature	Control	NC	N1	11	56	0
Nature	Control	NC	N1	11	57	0
Nature	Control	NC	N1	11	58	0
Nature	Control	NC	N1	11	59	0
Nature	Control	NC	N1	11	60	0
Nature	Control	NC	N1	11	61	0
Nature	Control	NC	N1	11	62	0
Nature	Control	NC	N1	11	63	0
Nature	Control	NC	N1	11	64	0
Nature	Control	NC	N1	11	65	0
Nature	Control	NC	N1	12	1	1
Nature	Control	NC	N1	12	2	1
Nature	Control	NC	N1	12	3	1
Nature	Control	NC	N1	12	4	1
Nature	Control	NC	N1	12	5	1
Nature	Control	NC	N1	12	6	1
Nature	Control	NC	N1	12	7	0
Nature	Control	NC	N1	12	8	0
Nature	Control	NC	N1	12	9	0
Nature	Control	NC	N1	12	10	0
Nature	Control	NC	N1	12	11	0
Nature	Control	NC	N1	12	12	0
Nature	Control	NC	N1	12	13	0
Nature	Control	NC	N1	12	14	0
Nature	Control	NC	N1	12	15	0
Nature	Control	NC	N1	12	16	0
Nature	Control	NC	N1	12	17	0
Nature	Control	NC	N1	12	18	0
Nature	Control	NC	N1	12	19	0
Nature	Control	NC	N1	12	20	0
Nature	Control	NC	N1	12	21	0
Nature	Control	NC	N1	12	22	0
Nature	Control	NC	N1	12	23	0
Nature	Control	NC	N1	12	24	0
Nature	Control	NC	N1	12	25	0
Nature	Control	NC	N1	12	26	0
Nature	Control	NC	N1	12	27	0
Nature	Control	NC	N1	12	28	0
Nature	Control	NC	N1	12	29	0
Nature	Control	NC	N1	12	30	0
Nature	Control	NC	N1	12	31	0
Nature	Control	NC	N1	12	32	0
Nature	Control	NC	N1	12	33	0
Nature	Control	NC	N1	12	34	0
Nature	Control	NC	N1	12	35	0
Nature	Control	NC	N1	12	36	0
Nature	Control	NC	N1	12	37	0
Nature	Control	NC	N1	12	38	0
Nature	Control	NC	N1	12	39	0
Nature	Control	NC	N1	12	40	0
Nature	Control	NC	N1	12	41	0
Nature	Control	NC	N1	12	42	0
Nature	Control	NC	N1	12	43	0
Nature	Control	NC	N1	12	44	0
Nature	Control	NC	N1	12	45	0
Nature	Control	NC	N1	12	46	0
Nature	Control	NC	N1	12	47	0
Nature	Control	NC	N1	12	48	0
Nature	Control	NC	N1	12	49	0
Nature	Control	NC	N1	12	50	0
Nature	Control	NC	N1	12	51	0
Nature	Control	NC	N1	12	52	0
Nature	Control	NC	N1	12	53	0
Nature	Control	NC	N1	12	54	0
Nature	Control	NC	N1	12	55	0
Nature	Control	NC	N1	12	56	0
Nature	Control	NC	N1	12	57	0
Nature	Control	NC	N1	12	58	0
Nature	Control	NC	N1	12	59	0
Nature	Control	NC	N1	12	60	0
Nature	Control	NC	N1	12	61	0
Nature	Control	NC	N1	12	62	0
Nature	Control	NC	N1	12	63	0
Nature	Control	NC	N1	12	64	0
Nature	Control	NC	N1	12	65	0
Nature	Control	NC	N1	13	1	1
Nature	Control	NC	N1	13	2	1
Nature	Control	NC	N1	13	3	1
Nature	Control	NC	N1	13	4	1
Nature	Control	NC	N1	13	5	1
Nature	Control	NC	N1	13	6	1
Nature	Control	NC	N1	13	7	1
Nature	Control	NC	N1	13	8	0
Nature	Control	NC	N1	13	9	0
Nature	Control	NC	N1	13	10	0
Nature	Control	NC	N1	13	11	0
Nature	Control	NC	N1	13	12	0
Nature	Control	NC	N1	13	13	0
Nature	Control	NC	N1	13	14	0
Nature	Control	NC	N1	13	15	0
Nature	Control	NC	N1	13	16	0
Nature	Control	NC	N1	13	17	0
Nature	Control	NC	N1	13	18	0
Nature	Control	NC	N1	13	19	0
Nature	Control	NC	N1	13	20	0
Nature	Control	NC	N1	13	21	0
Nature	Control	NC	N1	13	22	0
Nature	Control	NC	N1	13	23	0
Nature	Control	NC	N1	13	24	0
Nature	Control	NC	N1	13	25	0
Nature	Control	NC	N1	13	26	0
Nature	Control	NC	N1	13	27	0
Nature	Control	NC	N1	13	28	0
Nature	Control	NC	N1	13	29	0
Nature	Control	NC	N1	13	30	0
Nature	Control	NC	N1	13	31	0
Nature	Control	NC	N1	13	32	0
Nature	Control	NC	N1	13	33	0
Nature	Control	NC	N1	13	34	0
Nature	Control	NC	N1	13	35	0
Nature	Control	NC	N1	13	36	0
Nature	Control	NC	N1	13	37	0
Nature	Control	NC	N1	13	38	0
Nature	Control	NC	N1	13	39	0
Nature	Control	NC	N1	13	40	0
Nature	Control	NC	N1	13	41	0
Nature	Control	NC	N1	13	42	0
Nature	Control	NC	N1	13	43	0
Nature	Control	NC	N1	13	44	0
Nature	Control	NC	N1	13	45	0
Nature	Control	NC	N1	13	46	0
Nature	Control	NC	N1	13	47	0
Nature	Control	NC	N1	13	48	0
Nature	Control	NC	N1	13	49	0
Nature	Control	NC	N1	13	50	0
Nature	Control	NC	N1	13	51	0
Nature	Control	NC	N1	13	52	0
Nature	Control	NC	N1	13	53	0
Nature	Control	NC	N1	13	54	0
Nature	Control	NC	N1	13	55	0
Nature	Control	NC	N1	13	56	0
Nature	Control	NC	N1	13	57	0
Nature	Control	NC	N1	13	58	0
Nature	Control	NC	N1	13	59	0
Nature	Control	NC	N1	13	60	0
Nature	Control	NC	N1	13	61	0
Nature	Control	NC	N1	13	62	0
Nature	Control	NC	N1	13	63	0
Nature	Control	NC	N1	13	64	0
Nature	Control	NC	N1	13	65	0
Nature	Control	NC	N1	14	1	1
Nature	Control	NC	N1	14	2	1
Nature	Control	NC	N1	14	3	1
Nature	Control	NC	N1	14	4	1
Nature	Control	NC	N1	14	5	1
Nature	Control	NC	N1	14	6	1
Nature	Control	NC	N1	14	7	1
Nature	Control	NC	N1	14	8	0
Nature	Control	NC	N1	14	9	0
Nature	Control	NC	N1	14	10	0
Nature	Control	NC	N1	14	11	0
Nature	Control	NC	N1	14	12	0
Nature	Control	NC	N1	14	13	0
Nature	Control	NC	N1	14	14	0
Nature	Control	NC	N1	14	15	0
Nature	Control	NC	N1	14	16	0
Nature	Control	NC	N1	14	17	0
Nature	Control	NC	N1	14	18	0
Nature	Control	NC	N1	14	19	0
Nature	Control	NC	N1	14	20	0
Nature	Control	NC	N1	14	21	0
Nature	Control	NC	N1	14	22	0
Nature	Control	NC	N1	14	23	0
Nature	Control	NC	N1	14	24	0
Nature	Control	NC	N1	14	25	0
Nature	Control	NC	N1	14	26	0
Nature	Control	NC	N1	14	27	0
Nature	Control	NC	N1	14	28	0
Nature	Control	NC	N1	14	29	0
Nature	Control	NC	N1	14	30	0
Nature	Control	NC	N1	14	31	0
Nature	Control	NC	N1	14	32	0
Nature	Control	NC	N1	14	33	0
Nature	Control	NC	N1	14	34	0
Nature	Control	NC	N1	14	35	0
Nature	Control	NC	N1	14	36	0
Nature	Control	NC	N1	14	37	0
Nature	Control	NC	N1	14	38	0
Nature	Control	NC	N1	14	39	0
Nature	Control	NC	N1	14	40	0
Nature	Control	NC	N1	14	41	0
Nature	Control	NC	N1	14	42	0
Nature	Control	NC	N1	14	43	0
Nature	Control	NC	N1	14	44	0
Nature	Control	NC	N1	14	45	0
Nature	Control	NC	N1	14	46	0
Nature	Control	NC	N1	14	47	0
Nature	Control	NC	N1	14	48	0
Nature	Control	NC	N1	14	49	0
Nature	Control	NC	N1	14	50	0
Nature	Control	NC	N1	14	51	0
Nature	Control	NC	N1	14	52	0
Nature	Control	NC	N1	14	53	0
Nature	Control	NC	N1	14	54	0
Nature	Control	NC	N1	14	55	0
Nature	Control	NC	N1	14	56	0
Nature	Control	NC	N1	14	57	0
Nature	Control	NC	N1	14	58	0
Nature	Control	NC	N1	14	59	0
Nature	Control	NC	N1	14	60	0
Nature	Control	NC	N1	14	61	0
Nature	Control	NC	N1	14	62	0
Nature	Control	NC	N1	14	63	0
Nature	Control	NC	N1	14	64	0
Nature	Control	NC	N1	14	65	0
Nature	Control	NC	N1	15	1	1
Nature	Control	NC	N1	15	2	1
Nature	Control	NC	N1	15	3	1
Nature	Control	NC	N1	15	4	1
Nature	Control	NC	N1	15	5	1
Nature	Control	NC	N1	15	6	1
Nature	Control	NC	N1	15	7	1
Nature	Control	NC	N1	15	8	0
Nature	Control	NC	N1	15	9	0
Nature	Control	NC	N1	15	10	0
Nature	Control	NC	N1	15	11	0
Nature	Control	NC	N1	15	12	0
Nature	Control	NC	N1	15	13	0
Nature	Control	NC	N1	15	14	0
Nature	Control	NC	N1	15	15	0
Nature	Control	NC	N1	15	16	0
Nature	Control	NC	N1	15	17	0
Nature	Control	NC	N1	15	18	0
Nature	Control	NC	N1	15	19	0
Nature	Control	NC	N1	15	20	0
Nature	Control	NC	N1	15	21	0
Nature	Control	NC	N1	15	22	0
Nature	Control	NC	N1	15	23	0
Nature	Control	NC	N1	15	24	0
Nature	Control	NC	N1	15	25	0
Nature	Control	NC	N1	15	26	0
Nature	Control	NC	N1	15	27	0
Nature	Control	NC	N1	15	28	0
Nature	Control	NC	N1	15	29	0
Nature	Control	NC	N1	15	30	0
Nature	Control	NC	N1	15	31	0
Nature	Control	NC	N1	15	32	0
Nature	Control	NC	N1	15	33	0
Nature	Control	NC	N1	15	34	0
Nature	Control	NC	N1	15	35	0
Nature	Control	NC	N1	15	36	0
Nature	Control	NC	N1	15	37	0
Nature	Control	NC	N1	15	38	0
Nature	Control	NC	N1	15	39	0
Nature	Control	NC	N1	15	40	0
Nature	Control	NC	N1	15	41	0
Nature	Control	NC	N1	15	42	0
Nature	Control	NC	N1	15	43	0
Nature	Control	NC	N1	15	44	0
Nature	Control	NC	N1	15	45	0
Nature	Control	NC	N1	15	46	0
Nature	Control	NC	N1	15	47	0
Nature	Control	NC	N1	15	48	0
Nature	Control	NC	N1	15	49	0
Nature	Control	NC	N1	15	50	0
Nature	Control	NC	N1	15	51	0
Nature	Control	NC	N1	15	52	0
Nature	Control	NC	N1	15	53	0
Nature	Control	NC	N1	15	54	0
Nature	Control	NC	N1	15	55	0
Nature	Control	NC	N1	15	56	0
Nature	Control	NC	N1	15	57	0
Nature	Control	NC	N1	15	58	0
Nature	Control	NC	N1	15	59	0
Nature	Control	NC	N1	15	60	0
Nature	Control	NC	N1	15	61	0
Nature	Control	NC	N1	15	62	0
Nature	Control	NC	N1	15	63	0
Nature	Control	NC	N1	15	64	0
Nature	Control	NC	N1	15	65	0
Nature	Control	NC	N1	16	1	1
Nature	Control	NC	N1	16	2	1
Nature	Control	NC	N1	16	3	1
Nature	Control	NC	N1	16	4	1
Nature	Control	NC	N1	16	5	1
Nature	Control	NC	N1	16	6	1
Nature	Control	NC	N1	16	7	1
Nature	Control	NC	N1	16	8	0
Nature	Control	NC	N1	16	9	0
Nature	Control	NC	N1	16	10	0
Nature	Control	NC	N1	16	11	0
Nature	Control	NC	N1	16	12	0
Nature	Control	NC	N1	16	13	0
Nature	Control	NC	N1	16	14	0
Nature	Control	NC	N1	16	15	0
Nature	Control	NC	N1	16	16	0
Nature	Control	NC	N1	16	17	0
Nature	Control	NC	N1	16	18	0
Nature	Control	NC	N1	16	19	0
Nature	Control	NC	N1	16	20	0
Nature	Control	NC	N1	16	21	0
Nature	Control	NC	N1	16	22	0
Nature	Control	NC	N1	16	23	0
Nature	Control	NC	N1	16	24	0
Nature	Control	NC	N1	16	25	0
Nature	Control	NC	N1	16	26	0
Nature	Control	NC	N1	16	27	0
Nature	Control	NC	N1	16	28	0
Nature	Control	NC	N1	16	29	0
Nature	Control	NC	N1	16	30	0
Nature	Control	NC	N1	16	31	0
Nature	Control	NC	N1	16	32	0
Nature	Control	NC	N1	16	33	0
Nature	Control	NC	N1	16	34	0
Nature	Control	NC	N1	16	35	0
Nature	Control	NC	N1	16	36	0
Nature	Control	NC	N1	16	37	0
Nature	Control	NC	N1	16	38	0
Nature	Control	NC	N1	16	39	0
Nature	Control	NC	N1	16	40	0
Nature	Control	NC	N1	16	41	0
Nature	Control	NC	N1	16	42	0
Nature	Control	NC	N1	16	43	0
Nature	Control	NC	N1	16	44	0
Nature	Control	NC	N1	16	45	0
Nature	Control	NC	N1	16	46	0
Nature	Control	NC	N1	16	47	0
Nature	Control	NC	N1	16	48	0
Nature	Control	NC	N1	16	49	0
Nature	Control	NC	N1	16	50	0
Nature	Control	NC	N1	16	51	0
Nature	Control	NC	N1	16	52	0
Nature	Control	NC	N1	16	53	0
Nature	Control	NC	N1	16	54	0
Nature	Control	NC	N1	16	55	0
Nature	Control	NC	N1	16	56	0
Nature	Control	NC	N1	16	57	0
Nature	Control	NC	N1	16	58	0
Nature	Control	NC	N1	16	59	0
Nature	Control	NC	N1	16	60	0
Nature	Control	NC	N1	16	61	0
Nature	Control	NC	N1	16	62	0
Nature	Control	NC	N1	16	63	0
Nature	Control	NC	N1	16	64	0
Nature	Control	NC	N1	16	65	0
Nature	Control	NC	N1	17	1	1
Nature	Control	NC	N1	17	2	1
Nature	Control	NC	N1	17	3	1
Nature	Control	NC	N1	17	4	1
Nature	Control	NC	N1	17	5	1
Nature	Control	NC	N1	17	6	1
Nature	Control	NC	N1	17	7	1
Nature	Control	NC	N1	17	8	0
Nature	Control	NC	N1	17	9	0
Nature	Control	NC	N1	17	10	0
Nature	Control	NC	N1	17	11	0
Nature	Control	NC	N1	17	12	0
Nature	Control	NC	N1	17	13	0
Nature	Control	NC	N1	17	14	0
Nature	Control	NC	N1	17	15	0
Nature	Control	NC	N1	17	16	0
Nature	Control	NC	N1	17	17	0
Nature	Control	NC	N1	17	18	0
Nature	Control	NC	N1	17	19	0
Nature	Control	NC	N1	17	20	0
Nature	Control	NC	N1	17	21	0
Nature	Control	NC	N1	17	22	0
Nature	Control	NC	N1	17	23	0
Nature	Control	NC	N1	17	24	0
Nature	Control	NC	N1	17	25	0
Nature	Control	NC	N1	17	26	0
Nature	Control	NC	N1	17	27	0
Nature	Control	NC	N1	17	28	0
Nature	Control	NC	N1	17	29	0
Nature	Control	NC	N1	17	30	0
Nature	Control	NC	N1	17	31	0
Nature	Control	NC	N1	17	32	0
Nature	Control	NC	N1	17	33	0
Nature	Control	NC	N1	17	34	0
Nature	Control	NC	N1	17	35	0
Nature	Control	NC	N1	17	36	0
Nature	Control	NC	N1	17	37	0
Nature	Control	NC	N1	17	38	0
Nature	Control	NC	N1	17	39	0
Nature	Control	NC	N1	17	40	0
Nature	Control	NC	N1	17	41	0
Nature	Control	NC	N1	17	42	0
Nature	Control	NC	N1	17	43	0
Nature	Control	NC	N1	17	44	0
Nature	Control	NC	N1	17	45	0
Nature	Control	NC	N1	17	46	0
Nature	Control	NC	N1	17	47	0
Nature	Control	NC	N1	17	48	0
Nature	Control	NC	N1	17	49	0
Nature	Control	NC	N1	17	50	0
Nature	Control	NC	N1	17	51	0
Nature	Control	NC	N1	17	52	0
Nature	Control	NC	N1	17	53	0
Nature	Control	NC	N1	17	54	0
Nature	Control	NC	N1	17	55	0
Nature	Control	NC	N1	17	56	0
Nature	Control	NC	N1	17	57	0
Nature	Control	NC	N1	17	58	0
Nature	Control	NC	N1	17	59	0
Nature	Control	NC	N1	17	60	0
Nature	Control	NC	N1	17	61	0
Nature	Control	NC	N1	17	62	0
Nature	Control	NC	N1	17	63	0
Nature	Control	NC	N1	17	64	0
Nature	Control	NC	N1	17	65	0
Nature	Control	NC	N1	18	1	1
Nature	Control	NC	N1	18	2	1
Nature	Control	NC	N1	18	3	1
Nature	Control	NC	N1	18	4	1
Nature	Control	NC	N1	18	5	1
Nature	Control	NC	N1	18	6	1
Nature	Control	NC	N1	18	7	1
Nature	Control	NC	N1	18	8	0
Nature	Control	NC	N1	18	9	0
Nature	Control	NC	N1	18	10	0
Nature	Control	NC	N1	18	11	0
Nature	Control	NC	N1	18	12	0
Nature	Control	NC	N1	18	13	0
Nature	Control	NC	N1	18	14	0
Nature	Control	NC	N1	18	15	0
Nature	Control	NC	N1	18	16	0
Nature	Control	NC	N1	18	17	0
Nature	Control	NC	N1	18	18	0
Nature	Control	NC	N1	18	19	0
Nature	Control	NC	N1	18	20	0
Nature	Control	NC	N1	18	21	0
Nature	Control	NC	N1	18	22	0
Nature	Control	NC	N1	18	23	0
Nature	Control	NC	N1	18	24	0
Nature	Control	NC	N1	18	25	0
Nature	Control	NC	N1	18	26	0
Nature	Control	NC	N1	18	27	0
Nature	Control	NC	N1	18	28	0
Nature	Control	NC	N1	18	29	0
Nature	Control	NC	N1	18	30	0
Nature	Control	NC	N1	18	31	0
Nature	Control	NC	N1	18	32	0
Nature	Control	NC	N1	18	33	0
Nature	Control	NC	N1	18	34	0
Nature	Control	NC	N1	18	35	0
Nature	Control	NC	N1	18	36	0
Nature	Control	NC	N1	18	37	0
Nature	Control	NC	N1	18	38	0
Nature	Control	NC	N1	18	39	0
Nature	Control	NC	N1	18	40	0
Nature	Control	NC	N1	18	41	0
Nature	Control	NC	N1	18	42	0
Nature	Control	NC	N1	18	43	0
Nature	Control	NC	N1	18	44	0
Nature	Control	NC	N1	18	45	0
Nature	Control	NC	N1	18	46	0
Nature	Control	NC	N1	18	47	0
Nature	Control	NC	N1	18	48	0
Nature	Control	NC	N1	18	49	0
Nature	Control	NC	N1	18	50	0
Nature	Control	NC	N1	18	51	0
Nature	Control	NC	N1	18	52	0
Nature	Control	NC	N1	18	53	0
Nature	Control	NC	N1	18	54	0
Nature	Control	NC	N1	18	55	0
Nature	Control	NC	N1	18	56	0
Nature	Control	NC	N1	18	57	0
Nature	Control	NC	N1	18	58	0
Nature	Control	NC	N1	18	59	0
Nature	Control	NC	N1	18	60	0
Nature	Control	NC	N1	18	61	0
Nature	Control	NC	N1	18	62	0
Nature	Control	NC	N1	18	63	0
Nature	Control	NC	N1	18	64	0
Nature	Control	NC	N1	18	65	0
Nature	Control	NC	N1	19	1	1
Nature	Control	NC	N1	19	2	1
Nature	Control	NC	N1	19	3	1
Nature	Control	NC	N1	19	4	1
Nature	Control	NC	N1	19	5	1
Nature	Control	NC	N1	19	6	1
Nature	Control	NC	N1	19	7	1
Nature	Control	NC	N1	19	8	0
Nature	Control	NC	N1	19	9	0
Nature	Control	NC	N1	19	10	0
Nature	Control	NC	N1	19	11	0
Nature	Control	NC	N1	19	12	0
Nature	Control	NC	N1	19	13	0
Nature	Control	NC	N1	19	14	0
Nature	Control	NC	N1	19	15	0
Nature	Control	NC	N1	19	16	0
Nature	Control	NC	N1	19	17	0
Nature	Control	NC	N1	19	18	0
Nature	Control	NC	N1	19	19	0
Nature	Control	NC	N1	19	20	0
Nature	Control	NC	N1	19	21	0
Nature	Control	NC	N1	19	22	0
Nature	Control	NC	N1	19	23	0
Nature	Control	NC	N1	19	24	0
Nature	Control	NC	N1	19	25	0
Nature	Control	NC	N1	19	26	0
Nature	Control	NC	N1	19	27	0
Nature	Control	NC	N1	19	28	0
Nature	Control	NC	N1	19	29	0
Nature	Control	NC	N1	19	30	0
Nature	Control	NC	N1	19	31	0
Nature	Control	NC	N1	19	32	0
Nature	Control	NC	N1	19	33	0
Nature	Control	NC	N1	19	34	0
Nature	Control	NC	N1	19	35	0
Nature	Control	NC	N1	19	36	0
Nature	Control	NC	N1	19	37	0
Nature	Control	NC	N1	19	38	0
Nature	Control	NC	N1	19	39	0
Nature	Control	NC	N1	19	40	0
Nature	Control	NC	N1	19	41	0
Nature	Control	NC	N1	19	42	0
Nature	Control	NC	N1	19	43	0
Nature	Control	NC	N1	19	44	0
Nature	Control	NC	N1	19	45	0
Nature	Control	NC	N1	19	46	0
Nature	Control	NC	N1	19	47	0
Nature	Control	NC	N1	19	48	0
Nature	Control	NC	N1	19	49	0
Nature	Control	NC	N1	19	50	0
Nature	Control	NC	N1	19	51	0
Nature	Control	NC	N1	19	52	0
Nature	Control	NC	N1	19	53	0
Nature	Control	NC	N1	19	54	0
Nature	Control	NC	N1	19	55	0
Nature	Control	NC	N1	19	56	0
Nature	Control	NC	N1	19	57	0
Nature	Control	NC	N1	19	58	0
Nature	Control	NC	N1	19	59	0
Nature	Control	NC	N1	19	60	0
Nature	Control	NC	N1	19	61	0
Nature	Control	NC	N1	19	62	0
Nature	Control	NC	N1	19	63	0
Nature	Control	NC	N1	19	64	0
Nature	Control	NC	N1	19	65	0
Nature	Control	NC	N1	20	1	1
Nature	Control	NC	N1	20	2	1
Nature	Control	NC	N1	20	3	1
Nature	Control	NC	N1	20	4	1
Nature	Control	NC	N1	20	5	1
Nature	Control	NC	N1	20	6	1
Nature	Control	NC	N1	20	7	1
Nature	Control	NC	N1	20	8	0
Nature	Control	NC	N1	20	9	0
Nature	Control	NC	N1	20	10	0
Nature	Control	NC	N1	20	11	0
Nature	Control	NC	N1	20	12	0
Nature	Control	NC	N1	20	13	0
Nature	Control	NC	N1	20	14	0
Nature	Control	NC	N1	20	15	0
Nature	Control	NC	N1	20	16	0
Nature	Control	NC	N1	20	17	0
Nature	Control	NC	N1	20	18	0
Nature	Control	NC	N1	20	19	0
Nature	Control	NC	N1	20	20	0
Nature	Control	NC	N1	20	21	0
Nature	Control	NC	N1	20	22	0
Nature	Control	NC	N1	20	23	0
Nature	Control	NC	N1	20	24	0
Nature	Control	NC	N1	20	25	0
Nature	Control	NC	N1	20	26	0
Nature	Control	NC	N1	20	27	0
Nature	Control	NC	N1	20	28	0
Nature	Control	NC	N1	20	29	0
Nature	Control	NC	N1	20	30	0
Nature	Control	NC	N1	20	31	0
Nature	Control	NC	N1	20	32	0
Nature	Control	NC	N1	20	33	0
Nature	Control	NC	N1	20	34	0
Nature	Control	NC	N1	20	35	0
Nature	Control	NC	N1	20	36	0
Nature	Control	NC	N1	20	37	0
Nature	Control	NC	N1	20	38	0
Nature	Control	NC	N1	20	39	0
Nature	Control	NC	N1	20	40	0
Nature	Control	NC	N1	20	41	0
Nature	Control	NC	N1	20	42	0
Nature	Control	NC	N1	20	43	0
Nature	Control	NC	N1	20	44	0
Nature	Control	NC	N1	20	45	0
Nature	Control	NC	N1	20	46	0
Nature	Control	NC	N1	20	47	0
Nature	Control	NC	N1	20	48	0
Nature	Control	NC	N1	20	49	0
Nature	Control	NC	N1	20	50	0
Nature	Control	NC	N1	20	51	0
Nature	Control	NC	N1	20	52	0
Nature	Control	NC	N1	20	53	0
Nature	Control	NC	N1	20	54	0
Nature	Control	NC	N1	20	55	0
Nature	Control	NC	N1	20	56	0
Nature	Control	NC	N1	20	57	0
Nature	Control	NC	N1	20	58	0
Nature	Control	NC	N1	20	59	0
Nature	Control	NC	N1	20	60	0
Nature	Control	NC	N1	20	61	0
Nature	Control	NC	N1	20	62	0
Nature	Control	NC	N1	20	63	0
Nature	Control	NC	N1	20	64	0
Nature	Control	NC	N1	20	65	0
Nature	Control	NC	N1	21	1	1
Nature	Control	NC	N1	21	2	1
Nature	Control	NC	N1	21	3	1
Nature	Control	NC	N1	21	4	1
Nature	Control	NC	N1	21	5	1
Nature	Control	NC	N1	21	6	1
Nature	Control	NC	N1	21	7	1
Nature	Control	NC	N1	21	8	0
Nature	Control	NC	N1	21	9	0
Nature	Control	NC	N1	21	10	0
Nature	Control	NC	N1	21	11	0
Nature	Control	NC	N1	21	12	0
Nature	Control	NC	N1	21	13	0
Nature	Control	NC	N1	21	14	0
Nature	Control	NC	N1	21	15	0
Nature	Control	NC	N1	21	16	0
Nature	Control	NC	N1	21	17	0
Nature	Control	NC	N1	21	18	0
Nature	Control	NC	N1	21	19	0
Nature	Control	NC	N1	21	20	0
Nature	Control	NC	N1	21	21	0
Nature	Control	NC	N1	21	22	0
Nature	Control	NC	N1	21	23	0
Nature	Control	NC	N1	21	24	0
Nature	Control	NC	N1	21	25	0
Nature	Control	NC	N1	21	26	0
Nature	Control	NC	N1	21	27	0
Nature	Control	NC	N1	21	28	0
Nature	Control	NC	N1	21	29	0
Nature	Control	NC	N1	21	30	0
Nature	Control	NC	N1	21	31	0
Nature	Control	NC	N1	21	32	0
Nature	Control	NC	N1	21	33	0
Nature	Control	NC	N1	21	34	0
Nature	Control	NC	N1	21	35	0
Nature	Control	NC	N1	21	36	0
Nature	Control	NC	N1	21	37	0
Nature	Control	NC	N1	21	38	0
Nature	Control	NC	N1	21	39	0
Nature	Control	NC	N1	21	40	0
Nature	Control	NC	N1	21	41	0
Nature	Control	NC	N1	21	42	0
Nature	Control	NC	N1	21	43	0
Nature	Control	NC	N1	21	44	0
Nature	Control	NC	N1	21	45	0
Nature	Control	NC	N1	21	46	0
Nature	Control	NC	N1	21	47	0
Nature	Control	NC	N1	21	48	0
Nature	Control	NC	N1	21	49	0
Nature	Control	NC	N1	21	50	0
Nature	Control	NC	N1	21	51	0
Nature	Control	NC	N1	21	52	0
Nature	Control	NC	N1	21	53	0
Nature	Control	NC	N1	21	54	0
Nature	Control	NC	N1	21	55	0
Nature	Control	NC	N1	21	56	0
Nature	Control	NC	N1	21	57	0
Nature	Control	NC	N1	21	58	0
Nature	Control	NC	N1	21	59	0
Nature	Control	NC	N1	21	60	0
Nature	Control	NC	N1	21	61	0
Nature	Control	NC	N1	21	62	0
Nature	Control	NC	N1	21	63	0
Nature	Control	NC	N1	21	64	0
Nature	Control	NC	N1	21	65	0
Nature	Control	NC	N2	1	1	0
Nature	Control	NC	N2	1	2	0
Nature	Control	NC	N2	1	3	0
Nature	Control	NC	N2	1	4	0
Nature	Control	NC	N2	1	5	0
Nature	Control	NC	N2	1	6	0
Nature	Control	NC	N2	1	7	0
Nature	Control	NC	N2	1	8	0
Nature	Control	NC	N2	1	9	0
Nature	Control	NC	N2	1	10	0
Nature	Control	NC	N2	1	11	0
Nature	Control	NC	N2	1	12	0
Nature	Control	NC	N2	1	13	0
Nature	Control	NC	N2	1	14	0
Nature	Control	NC	N2	1	15	0
Nature	Control	NC	N2	1	16	0
Nature	Control	NC	N2	1	17	0
Nature	Control	NC	N2	1	18	0
Nature	Control	NC	N2	1	19	0
Nature	Control	NC	N2	1	20	0
Nature	Control	NC	N2	1	21	0
Nature	Control	NC	N2	1	22	0
Nature	Control	NC	N2	1	23	0
Nature	Control	NC	N2	1	24	0
Nature	Control	NC	N2	1	25	0
Nature	Control	NC	N2	1	26	0
Nature	Control	NC	N2	1	27	0
Nature	Control	NC	N2	1	28	0
Nature	Control	NC	N2	1	29	0
Nature	Control	NC	N2	1	30	0
Nature	Control	NC	N2	1	31	0
Nature	Control	NC	N2	1	32	0
Nature	Control	NC	N2	1	33	0
Nature	Control	NC	N2	1	34	0
Nature	Control	NC	N2	1	35	0
Nature	Control	NC	N2	1	36	0
Nature	Control	NC	N2	1	37	0
Nature	Control	NC	N2	1	38	0
Nature	Control	NC	N2	1	39	0
Nature	Control	NC	N2	1	40	0
Nature	Control	NC	N2	1	41	0
Nature	Control	NC	N2	1	42	0
Nature	Control	NC	N2	1	43	0
Nature	Control	NC	N2	1	44	0
Nature	Control	NC	N2	1	45	0
Nature	Control	NC	N2	1	46	0
Nature	Control	NC	N2	1	47	0
Nature	Control	NC	N2	1	48	0
Nature	Control	NC	N2	1	49	0
Nature	Control	NC	N2	1	50	0
Nature	Control	NC	N2	1	51	0
Nature	Control	NC	N2	1	52	0
Nature	Control	NC	N2	1	53	0
Nature	Control	NC	N2	1	54	0
Nature	Control	NC	N2	1	55	0
Nature	Control	NC	N2	1	56	0
Nature	Control	NC	N2	1	57	0
Nature	Control	NC	N2	1	58	0
Nature	Control	NC	N2	1	59	0
Nature	Control	NC	N2	1	60	0
Nature	Control	NC	N2	2	1	1
Nature	Control	NC	N2	2	2	1
Nature	Control	NC	N2	2	3	1
Nature	Control	NC	N2	2	4	1
Nature	Control	NC	N2	2	5	0
Nature	Control	NC	N2	2	6	0
Nature	Control	NC	N2	2	7	0
Nature	Control	NC	N2	2	8	0
Nature	Control	NC	N2	2	9	0
Nature	Control	NC	N2	2	10	0
Nature	Control	NC	N2	2	11	0
Nature	Control	NC	N2	2	12	0
Nature	Control	NC	N2	2	13	0
Nature	Control	NC	N2	2	14	0
Nature	Control	NC	N2	2	15	0
Nature	Control	NC	N2	2	16	0
Nature	Control	NC	N2	2	17	0
Nature	Control	NC	N2	2	18	0
Nature	Control	NC	N2	2	19	0
Nature	Control	NC	N2	2	20	0
Nature	Control	NC	N2	2	21	0
Nature	Control	NC	N2	2	22	0
Nature	Control	NC	N2	2	23	0
Nature	Control	NC	N2	2	24	0
Nature	Control	NC	N2	2	25	0
Nature	Control	NC	N2	2	26	0
Nature	Control	NC	N2	2	27	0
Nature	Control	NC	N2	2	28	0
Nature	Control	NC	N2	2	29	0
Nature	Control	NC	N2	2	30	0
Nature	Control	NC	N2	2	31	0
Nature	Control	NC	N2	2	32	0
Nature	Control	NC	N2	2	33	0
Nature	Control	NC	N2	2	34	0
Nature	Control	NC	N2	2	35	0
Nature	Control	NC	N2	2	36	0
Nature	Control	NC	N2	2	37	0
Nature	Control	NC	N2	2	38	0
Nature	Control	NC	N2	2	39	0
Nature	Control	NC	N2	2	40	0
Nature	Control	NC	N2	2	41	0
Nature	Control	NC	N2	2	42	0
Nature	Control	NC	N2	2	43	0
Nature	Control	NC	N2	2	44	0
Nature	Control	NC	N2	2	45	0
Nature	Control	NC	N2	2	46	0
Nature	Control	NC	N2	2	47	0
Nature	Control	NC	N2	2	48	0
Nature	Control	NC	N2	2	49	0
Nature	Control	NC	N2	2	50	0
Nature	Control	NC	N2	2	51	0
Nature	Control	NC	N2	2	52	0
Nature	Control	NC	N2	2	53	0
Nature	Control	NC	N2	2	54	0
Nature	Control	NC	N2	2	55	0
Nature	Control	NC	N2	2	56	0
Nature	Control	NC	N2	2	57	0
Nature	Control	NC	N2	2	58	0
Nature	Control	NC	N2	2	59	0
Nature	Control	NC	N2	2	60	0
Nature	Control	NC	N2	3	1	1
Nature	Control	NC	N2	3	2	1
Nature	Control	NC	N2	3	3	1
Nature	Control	NC	N2	3	4	1
Nature	Control	NC	N2	3	5	0
Nature	Control	NC	N2	3	6	0
Nature	Control	NC	N2	3	7	0
Nature	Control	NC	N2	3	8	0
Nature	Control	NC	N2	3	9	0
Nature	Control	NC	N2	3	10	0
Nature	Control	NC	N2	3	11	0
Nature	Control	NC	N2	3	12	0
Nature	Control	NC	N2	3	13	0
Nature	Control	NC	N2	3	14	0
Nature	Control	NC	N2	3	15	0
Nature	Control	NC	N2	3	16	0
Nature	Control	NC	N2	3	17	0
Nature	Control	NC	N2	3	18	0
Nature	Control	NC	N2	3	19	0
Nature	Control	NC	N2	3	20	0
Nature	Control	NC	N2	3	21	0
Nature	Control	NC	N2	3	22	0
Nature	Control	NC	N2	3	23	0
Nature	Control	NC	N2	3	24	0
Nature	Control	NC	N2	3	25	0
Nature	Control	NC	N2	3	26	0
Nature	Control	NC	N2	3	27	0
Nature	Control	NC	N2	3	28	0
Nature	Control	NC	N2	3	29	0
Nature	Control	NC	N2	3	30	0
Nature	Control	NC	N2	3	31	0
Nature	Control	NC	N2	3	32	0
Nature	Control	NC	N2	3	33	0
Nature	Control	NC	N2	3	34	0
Nature	Control	NC	N2	3	35	0
Nature	Control	NC	N2	3	36	0
Nature	Control	NC	N2	3	37	0
Nature	Control	NC	N2	3	38	0
Nature	Control	NC	N2	3	39	0
Nature	Control	NC	N2	3	40	0
Nature	Control	NC	N2	3	41	0
Nature	Control	NC	N2	3	42	0
Nature	Control	NC	N2	3	43	0
Nature	Control	NC	N2	3	44	0
Nature	Control	NC	N2	3	45	0
Nature	Control	NC	N2	3	46	0
Nature	Control	NC	N2	3	47	0
Nature	Control	NC	N2	3	48	0
Nature	Control	NC	N2	3	49	0
Nature	Control	NC	N2	3	50	0
Nature	Control	NC	N2	3	51	0
Nature	Control	NC	N2	3	52	0
Nature	Control	NC	N2	3	53	0
Nature	Control	NC	N2	3	54	0
Nature	Control	NC	N2	3	55	0
Nature	Control	NC	N2	3	56	0
Nature	Control	NC	N2	3	57	0
Nature	Control	NC	N2	3	58	0
Nature	Control	NC	N2	3	59	0
Nature	Control	NC	N2	3	60	0
Nature	Control	NC	N2	4	1	1
Nature	Control	NC	N2	4	2	1
Nature	Control	NC	N2	4	3	1
Nature	Control	NC	N2	4	4	1
Nature	Control	NC	N2	4	5	0
Nature	Control	NC	N2	4	6	0
Nature	Control	NC	N2	4	7	0
Nature	Control	NC	N2	4	8	0
Nature	Control	NC	N2	4	9	0
Nature	Control	NC	N2	4	10	0
Nature	Control	NC	N2	4	11	0
Nature	Control	NC	N2	4	12	0
Nature	Control	NC	N2	4	13	0
Nature	Control	NC	N2	4	14	0
Nature	Control	NC	N2	4	15	0
Nature	Control	NC	N2	4	16	0
Nature	Control	NC	N2	4	17	0
Nature	Control	NC	N2	4	18	0
Nature	Control	NC	N2	4	19	0
Nature	Control	NC	N2	4	20	0
Nature	Control	NC	N2	4	21	0
Nature	Control	NC	N2	4	22	0
Nature	Control	NC	N2	4	23	0
Nature	Control	NC	N2	4	24	0
Nature	Control	NC	N2	4	25	0
Nature	Control	NC	N2	4	26	0
Nature	Control	NC	N2	4	27	0
Nature	Control	NC	N2	4	28	0
Nature	Control	NC	N2	4	29	0
Nature	Control	NC	N2	4	30	0
Nature	Control	NC	N2	4	31	0
Nature	Control	NC	N2	4	32	0
Nature	Control	NC	N2	4	33	0
Nature	Control	NC	N2	4	34	0
Nature	Control	NC	N2	4	35	0
Nature	Control	NC	N2	4	36	0
Nature	Control	NC	N2	4	37	0
Nature	Control	NC	N2	4	38	0
Nature	Control	NC	N2	4	39	0
Nature	Control	NC	N2	4	40	0
Nature	Control	NC	N2	4	41	0
Nature	Control	NC	N2	4	42	0
Nature	Control	NC	N2	4	43	0
Nature	Control	NC	N2	4	44	0
Nature	Control	NC	N2	4	45	0
Nature	Control	NC	N2	4	46	0
Nature	Control	NC	N2	4	47	0
Nature	Control	NC	N2	4	48	0
Nature	Control	NC	N2	4	49	0
Nature	Control	NC	N2	4	50	0
Nature	Control	NC	N2	4	51	0
Nature	Control	NC	N2	4	52	0
Nature	Control	NC	N2	4	53	0
Nature	Control	NC	N2	4	54	0
Nature	Control	NC	N2	4	55	0
Nature	Control	NC	N2	4	56	0
Nature	Control	NC	N2	4	57	0
Nature	Control	NC	N2	4	58	0
Nature	Control	NC	N2	4	59	0
Nature	Control	NC	N2	4	60	0
Nature	Control	NC	N2	5	1	1
Nature	Control	NC	N2	5	2	1
Nature	Control	NC	N2	5	3	1
Nature	Control	NC	N2	5	4	1
Nature	Control	NC	N2	5	5	0
Nature	Control	NC	N2	5	6	0
Nature	Control	NC	N2	5	7	0
Nature	Control	NC	N2	5	8	0
Nature	Control	NC	N2	5	9	0
Nature	Control	NC	N2	5	10	0
Nature	Control	NC	N2	5	11	0
Nature	Control	NC	N2	5	12	0
Nature	Control	NC	N2	5	13	0
Nature	Control	NC	N2	5	14	0
Nature	Control	NC	N2	5	15	0
Nature	Control	NC	N2	5	16	0
Nature	Control	NC	N2	5	17	0
Nature	Control	NC	N2	5	18	0
Nature	Control	NC	N2	5	19	0
Nature	Control	NC	N2	5	20	0
Nature	Control	NC	N2	5	21	0
Nature	Control	NC	N2	5	22	0
Nature	Control	NC	N2	5	23	0
Nature	Control	NC	N2	5	24	0
Nature	Control	NC	N2	5	25	0
Nature	Control	NC	N2	5	26	0
Nature	Control	NC	N2	5	27	0
Nature	Control	NC	N2	5	28	0
Nature	Control	NC	N2	5	29	0
Nature	Control	NC	N2	5	30	0
Nature	Control	NC	N2	5	31	0
Nature	Control	NC	N2	5	32	0
Nature	Control	NC	N2	5	33	0
Nature	Control	NC	N2	5	34	0
Nature	Control	NC	N2	5	35	0
Nature	Control	NC	N2	5	36	0
Nature	Control	NC	N2	5	37	0
Nature	Control	NC	N2	5	38	0
Nature	Control	NC	N2	5	39	0
Nature	Control	NC	N2	5	40	0
Nature	Control	NC	N2	5	41	0
Nature	Control	NC	N2	5	42	0
Nature	Control	NC	N2	5	43	0
Nature	Control	NC	N2	5	44	0
Nature	Control	NC	N2	5	45	0
Nature	Control	NC	N2	5	46	0
Nature	Control	NC	N2	5	47	0
Nature	Control	NC	N2	5	48	0
Nature	Control	NC	N2	5	49	0
Nature	Control	NC	N2	5	50	0
Nature	Control	NC	N2	5	51	0
Nature	Control	NC	N2	5	52	0
Nature	Control	NC	N2	5	53	0
Nature	Control	NC	N2	5	54	0
Nature	Control	NC	N2	5	55	0
Nature	Control	NC	N2	5	56	0
Nature	Control	NC	N2	5	57	0
Nature	Control	NC	N2	5	58	0
Nature	Control	NC	N2	5	59	0
Nature	Control	NC	N2	5	60	0
Nature	Control	NC	N2	6	1	1
Nature	Control	NC	N2	6	2	1
Nature	Control	NC	N2	6	3	1
Nature	Control	NC	N2	6	4	1
Nature	Control	NC	N2	6	5	1
Nature	Control	NC	N2	6	6	0
Nature	Control	NC	N2	6	7	0
Nature	Control	NC	N2	6	8	0
Nature	Control	NC	N2	6	9	0
Nature	Control	NC	N2	6	10	0
Nature	Control	NC	N2	6	11	0
Nature	Control	NC	N2	6	12	0
Nature	Control	NC	N2	6	13	0
Nature	Control	NC	N2	6	14	0
Nature	Control	NC	N2	6	15	0
Nature	Control	NC	N2	6	16	0
Nature	Control	NC	N2	6	17	0
Nature	Control	NC	N2	6	18	0
Nature	Control	NC	N2	6	19	0
Nature	Control	NC	N2	6	20	0
Nature	Control	NC	N2	6	21	0
Nature	Control	NC	N2	6	22	0
Nature	Control	NC	N2	6	23	0
Nature	Control	NC	N2	6	24	0
Nature	Control	NC	N2	6	25	0
Nature	Control	NC	N2	6	26	0
Nature	Control	NC	N2	6	27	0
Nature	Control	NC	N2	6	28	0
Nature	Control	NC	N2	6	29	0
Nature	Control	NC	N2	6	30	0
Nature	Control	NC	N2	6	31	0
Nature	Control	NC	N2	6	32	0
Nature	Control	NC	N2	6	33	0
Nature	Control	NC	N2	6	34	0
Nature	Control	NC	N2	6	35	0
Nature	Control	NC	N2	6	36	0
Nature	Control	NC	N2	6	37	0
Nature	Control	NC	N2	6	38	0
Nature	Control	NC	N2	6	39	0
Nature	Control	NC	N2	6	40	0
Nature	Control	NC	N2	6	41	0
Nature	Control	NC	N2	6	42	0
Nature	Control	NC	N2	6	43	0
Nature	Control	NC	N2	6	44	0
Nature	Control	NC	N2	6	45	0
Nature	Control	NC	N2	6	46	0
Nature	Control	NC	N2	6	47	0
Nature	Control	NC	N2	6	48	0
Nature	Control	NC	N2	6	49	0
Nature	Control	NC	N2	6	50	0
Nature	Control	NC	N2	6	51	0
Nature	Control	NC	N2	6	52	0
Nature	Control	NC	N2	6	53	0
Nature	Control	NC	N2	6	54	0
Nature	Control	NC	N2	6	55	0
Nature	Control	NC	N2	6	56	0
Nature	Control	NC	N2	6	57	0
Nature	Control	NC	N2	6	58	0
Nature	Control	NC	N2	6	59	0
Nature	Control	NC	N2	6	60	0
Nature	Control	NC	N2	7	1	1
Nature	Control	NC	N2	7	2	1
Nature	Control	NC	N2	7	3	1
Nature	Control	NC	N2	7	4	1
Nature	Control	NC	N2	7	5	1
Nature	Control	NC	N2	7	6	0
Nature	Control	NC	N2	7	7	0
Nature	Control	NC	N2	7	8	0
Nature	Control	NC	N2	7	9	0
Nature	Control	NC	N2	7	10	0
Nature	Control	NC	N2	7	11	0
Nature	Control	NC	N2	7	12	0
Nature	Control	NC	N2	7	13	0
Nature	Control	NC	N2	7	14	0
Nature	Control	NC	N2	7	15	0
Nature	Control	NC	N2	7	16	0
Nature	Control	NC	N2	7	17	0
Nature	Control	NC	N2	7	18	0
Nature	Control	NC	N2	7	19	0
Nature	Control	NC	N2	7	20	0
Nature	Control	NC	N2	7	21	0
Nature	Control	NC	N2	7	22	0
Nature	Control	NC	N2	7	23	0
Nature	Control	NC	N2	7	24	0
Nature	Control	NC	N2	7	25	0
Nature	Control	NC	N2	7	26	0
Nature	Control	NC	N2	7	27	0
Nature	Control	NC	N2	7	28	0
Nature	Control	NC	N2	7	29	0
Nature	Control	NC	N2	7	30	0
Nature	Control	NC	N2	7	31	0
Nature	Control	NC	N2	7	32	0
Nature	Control	NC	N2	7	33	0
Nature	Control	NC	N2	7	34	0
Nature	Control	NC	N2	7	35	0
Nature	Control	NC	N2	7	36	0
Nature	Control	NC	N2	7	37	0
Nature	Control	NC	N2	7	38	0
Nature	Control	NC	N2	7	39	0
Nature	Control	NC	N2	7	40	0
Nature	Control	NC	N2	7	41	0
Nature	Control	NC	N2	7	42	0
Nature	Control	NC	N2	7	43	0
Nature	Control	NC	N2	7	44	0
Nature	Control	NC	N2	7	45	0
Nature	Control	NC	N2	7	46	0
Nature	Control	NC	N2	7	47	0
Nature	Control	NC	N2	7	48	0
Nature	Control	NC	N2	7	49	0
Nature	Control	NC	N2	7	50	0
Nature	Control	NC	N2	7	51	0
Nature	Control	NC	N2	7	52	0
Nature	Control	NC	N2	7	53	0
Nature	Control	NC	N2	7	54	0
Nature	Control	NC	N2	7	55	0
Nature	Control	NC	N2	7	56	0
Nature	Control	NC	N2	7	57	0
Nature	Control	NC	N2	7	58	0
Nature	Control	NC	N2	7	59	0
Nature	Control	NC	N2	7	60	0
Nature	Control	NC	N2	8	1	1
Nature	Control	NC	N2	8	2	1
Nature	Control	NC	N2	8	3	1
Nature	Control	NC	N2	8	4	1
Nature	Control	NC	N2	8	5	1
Nature	Control	NC	N2	8	6	0
Nature	Control	NC	N2	8	7	0
Nature	Control	NC	N2	8	8	0
Nature	Control	NC	N2	8	9	0
Nature	Control	NC	N2	8	10	0
Nature	Control	NC	N2	8	11	0
Nature	Control	NC	N2	8	12	0
Nature	Control	NC	N2	8	13	0
Nature	Control	NC	N2	8	14	0
Nature	Control	NC	N2	8	15	0
Nature	Control	NC	N2	8	16	0
Nature	Control	NC	N2	8	17	0
Nature	Control	NC	N2	8	18	0
Nature	Control	NC	N2	8	19	0
Nature	Control	NC	N2	8	20	0
Nature	Control	NC	N2	8	21	0
Nature	Control	NC	N2	8	22	0
Nature	Control	NC	N2	8	23	0
Nature	Control	NC	N2	8	24	0
Nature	Control	NC	N2	8	25	0
Nature	Control	NC	N2	8	26	0
Nature	Control	NC	N2	8	27	0
Nature	Control	NC	N2	8	28	0
Nature	Control	NC	N2	8	29	0
Nature	Control	NC	N2	8	30	0
Nature	Control	NC	N2	8	31	0
Nature	Control	NC	N2	8	32	0
Nature	Control	NC	N2	8	33	0
Nature	Control	NC	N2	8	34	0
Nature	Control	NC	N2	8	35	0
Nature	Control	NC	N2	8	36	0
Nature	Control	NC	N2	8	37	0
Nature	Control	NC	N2	8	38	0
Nature	Control	NC	N2	8	39	0
Nature	Control	NC	N2	8	40	0
Nature	Control	NC	N2	8	41	0
Nature	Control	NC	N2	8	42	0
Nature	Control	NC	N2	8	43	0
Nature	Control	NC	N2	8	44	0
Nature	Control	NC	N2	8	45	0
Nature	Control	NC	N2	8	46	0
Nature	Control	NC	N2	8	47	0
Nature	Control	NC	N2	8	48	0
Nature	Control	NC	N2	8	49	0
Nature	Control	NC	N2	8	50	0
Nature	Control	NC	N2	8	51	0
Nature	Control	NC	N2	8	52	0
Nature	Control	NC	N2	8	53	0
Nature	Control	NC	N2	8	54	0
Nature	Control	NC	N2	8	55	0
Nature	Control	NC	N2	8	56	0
Nature	Control	NC	N2	8	57	0
Nature	Control	NC	N2	8	58	0
Nature	Control	NC	N2	8	59	0
Nature	Control	NC	N2	8	60	0
Nature	Control	NC	N2	9	1	1
Nature	Control	NC	N2	9	2	1
Nature	Control	NC	N2	9	3	1
Nature	Control	NC	N2	9	4	1
Nature	Control	NC	N2	9	5	1
Nature	Control	NC	N2	9	6	1
Nature	Control	NC	N2	9	7	0
Nature	Control	NC	N2	9	8	0
Nature	Control	NC	N2	9	9	0
Nature	Control	NC	N2	9	10	0
Nature	Control	NC	N2	9	11	0
Nature	Control	NC	N2	9	12	0
Nature	Control	NC	N2	9	13	0
Nature	Control	NC	N2	9	14	0
Nature	Control	NC	N2	9	15	0
Nature	Control	NC	N2	9	16	0
Nature	Control	NC	N2	9	17	0
Nature	Control	NC	N2	9	18	0
Nature	Control	NC	N2	9	19	0
Nature	Control	NC	N2	9	20	0
Nature	Control	NC	N2	9	21	0
Nature	Control	NC	N2	9	22	0
Nature	Control	NC	N2	9	23	0
Nature	Control	NC	N2	9	24	0
Nature	Control	NC	N2	9	25	0
Nature	Control	NC	N2	9	26	0
Nature	Control	NC	N2	9	27	0
Nature	Control	NC	N2	9	28	0
Nature	Control	NC	N2	9	29	0
Nature	Control	NC	N2	9	30	0
Nature	Control	NC	N2	9	31	0
Nature	Control	NC	N2	9	32	0
Nature	Control	NC	N2	9	33	0
Nature	Control	NC	N2	9	34	0
Nature	Control	NC	N2	9	35	0
Nature	Control	NC	N2	9	36	0
Nature	Control	NC	N2	9	37	0
Nature	Control	NC	N2	9	38	0
Nature	Control	NC	N2	9	39	0
Nature	Control	NC	N2	9	40	0
Nature	Control	NC	N2	9	41	0
Nature	Control	NC	N2	9	42	0
Nature	Control	NC	N2	9	43	0
Nature	Control	NC	N2	9	44	0
Nature	Control	NC	N2	9	45	0
Nature	Control	NC	N2	9	46	0
Nature	Control	NC	N2	9	47	0
Nature	Control	NC	N2	9	48	0
Nature	Control	NC	N2	9	49	0
Nature	Control	NC	N2	9	50	0
Nature	Control	NC	N2	9	51	0
Nature	Control	NC	N2	9	52	0
Nature	Control	NC	N2	9	53	0
Nature	Control	NC	N2	9	54	0
Nature	Control	NC	N2	9	55	0
Nature	Control	NC	N2	9	56	0
Nature	Control	NC	N2	9	57	0
Nature	Control	NC	N2	9	58	0
Nature	Control	NC	N2	9	59	0
Nature	Control	NC	N2	9	60	0
Nature	Control	NC	N2	10	1	1
Nature	Control	NC	N2	10	2	1
Nature	Control	NC	N2	10	3	1
Nature	Control	NC	N2	10	4	1
Nature	Control	NC	N2	10	5	1
Nature	Control	NC	N2	10	6	1
Nature	Control	NC	N2	10	7	1
Nature	Control	NC	N2	10	8	0
Nature	Control	NC	N2	10	9	0
Nature	Control	NC	N2	10	10	0
Nature	Control	NC	N2	10	11	0
Nature	Control	NC	N2	10	12	0
Nature	Control	NC	N2	10	13	0
Nature	Control	NC	N2	10	14	0
Nature	Control	NC	N2	10	15	0
Nature	Control	NC	N2	10	16	0
Nature	Control	NC	N2	10	17	0
Nature	Control	NC	N2	10	18	0
Nature	Control	NC	N2	10	19	0
Nature	Control	NC	N2	10	20	0
Nature	Control	NC	N2	10	21	0
Nature	Control	NC	N2	10	22	0
Nature	Control	NC	N2	10	23	0
Nature	Control	NC	N2	10	24	0
Nature	Control	NC	N2	10	25	0
Nature	Control	NC	N2	10	26	0
Nature	Control	NC	N2	10	27	0
Nature	Control	NC	N2	10	28	0
Nature	Control	NC	N2	10	29	0
Nature	Control	NC	N2	10	30	0
Nature	Control	NC	N2	10	31	0
Nature	Control	NC	N2	10	32	0
Nature	Control	NC	N2	10	33	0
Nature	Control	NC	N2	10	34	0
Nature	Control	NC	N2	10	35	0
Nature	Control	NC	N2	10	36	0
Nature	Control	NC	N2	10	37	0
Nature	Control	NC	N2	10	38	0
Nature	Control	NC	N2	10	39	0
Nature	Control	NC	N2	10	40	0
Nature	Control	NC	N2	10	41	0
Nature	Control	NC	N2	10	42	0
Nature	Control	NC	N2	10	43	0
Nature	Control	NC	N2	10	44	0
Nature	Control	NC	N2	10	45	0
Nature	Control	NC	N2	10	46	0
Nature	Control	NC	N2	10	47	0
Nature	Control	NC	N2	10	48	0
Nature	Control	NC	N2	10	49	0
Nature	Control	NC	N2	10	50	0
Nature	Control	NC	N2	10	51	0
Nature	Control	NC	N2	10	52	0
Nature	Control	NC	N2	10	53	0
Nature	Control	NC	N2	10	54	0
Nature	Control	NC	N2	10	55	0
Nature	Control	NC	N2	10	56	0
Nature	Control	NC	N2	10	57	0
Nature	Control	NC	N2	10	58	0
Nature	Control	NC	N2	10	59	0
Nature	Control	NC	N2	10	60	0
Nature	Control	NC	N2	11	1	1
Nature	Control	NC	N2	11	2	1
Nature	Control	NC	N2	11	3	1
Nature	Control	NC	N2	11	4	1
Nature	Control	NC	N2	11	5	1
Nature	Control	NC	N2	11	6	1
Nature	Control	NC	N2	11	7	1
Nature	Control	NC	N2	11	8	0
Nature	Control	NC	N2	11	9	0
Nature	Control	NC	N2	11	10	0
Nature	Control	NC	N2	11	11	0
Nature	Control	NC	N2	11	12	0
Nature	Control	NC	N2	11	13	0
Nature	Control	NC	N2	11	14	0
Nature	Control	NC	N2	11	15	0
Nature	Control	NC	N2	11	16	0
Nature	Control	NC	N2	11	17	0
Nature	Control	NC	N2	11	18	0
Nature	Control	NC	N2	11	19	0
Nature	Control	NC	N2	11	20	0
Nature	Control	NC	N2	11	21	0
Nature	Control	NC	N2	11	22	0
Nature	Control	NC	N2	11	23	0
Nature	Control	NC	N2	11	24	0
Nature	Control	NC	N2	11	25	0
Nature	Control	NC	N2	11	26	0
Nature	Control	NC	N2	11	27	0
Nature	Control	NC	N2	11	28	0
Nature	Control	NC	N2	11	29	0
Nature	Control	NC	N2	11	30	0
Nature	Control	NC	N2	11	31	0
Nature	Control	NC	N2	11	32	0
Nature	Control	NC	N2	11	33	0
Nature	Control	NC	N2	11	34	0
[truncated: 33,630 more rows]

## Sheet: Larval size_source
Nature	Area	Mean	Min	Max	Angle	Lengh				Normal	Area	Mean	Min	Max	Angle	Lengh				Stress	Area	Mean	Min	Max	Angle	Lengh
1	544.595	5.728	3.032	71.333	-64.547	1001.5				1	411.141	3.459	1.295	82.382	-106.136	1403.24				1	495.77	5.746	2.529	144.333	-141.911	915.821
2	186.946	7.224	2.948	123.667	25.916	343.19				2	230.169	4.288	1.243	138.358	-22.968	784.543				2	250.374	5.784	2.78	14.344	-51.277	461.944
3	504.43	3.25	0.329	97.727	-21.228	1706.85				3	454.48	3.208	1.346	31.539	-154.343	1551.22				3	482.593	6.165	3.173	145	-78.445	891.473
4	229.474	3.751	0.148	88.731	-106.706	775.787				4	223.433	4.298	1.375	110.093	-66.969	761.937				4	247.153	5.594	2.878	14.019	14.432	455.961
5	549.025	2.458	0.35	94.182	10.572	1857.87				5	501.041	3.422	1.136	149.846	-141.79	1710.22				5	548.188	4.765	2.259	89.667	-149.982	1012.46
6	242.469	3.456	0.547	110.429	-76.675	819.839				6	205.278	3.56	1.318	14.599	-53.539	699.535				6	264.138	6.144	2.725	131.527	-57.792	487.342
7	581.217	1.855	0.137	53.667	-63.357	1966.85				7	434.57	5.416	2.15	81.667	-103.88	833.719				7	516.269	2.047	0.604	21.667	-21.584	953.233
8	207.915	2.972	0.168	44.333	26.346	703.025				8	182.02	6.608	2.522	145.277	-12.417	348.784				8	268.237	2.922	0.15	86.394	64.779	495.281
9	488.777	3.714	1.638	26	-151.39	1653.95				9	618.175	3.848	1.684	96	-3.586	2110.13				9	486.692	1.427	0.02	16.333	-34.551	898.816
10	231.837	5.697	1.801	132.201	-62.65	783.592				10	193.857	7.461	2.025	148.997	-93.641	661.335				10	258.866	1.943	0.051	42.667	-121.097	477.762
11	601.004	3.096	1.092	26.333	-137.033	2033.5				11	496.419	4.838	1.337	148	-134.867	952.387				11	535.303	3.225	1.432	11.362	-26.733	988.842
12	305.966	3.137	1.101	21.029	-45	1035.2				12	205.078	4.911	1.886	87.667	-44.356	393.353				12	294.3	4.629	1.605	105.351	64.507	543.157
13	559.362	3.105	1.04	112.201	-159.21	1893.27				13	521.376	5.787	2.033	156.638	-54.92	1000.49				13	495.77	3.197	0.351	105.309	-108.82	915.878
14	187.832	5.626	1.084	119.939	-74.65	634.64				14	204.807	4.459	2.108	22.667	33.311	392.632				14	252.131	4.103	1.041	106.381	-15.781	465.615
15	514.767	1.706	0.014	58.64	-75.437	1741.96				15	494.306	3.594	1.237	53	-80.169	912.782				15	530.618	3.107	1.311	29.667	-36.376	979.937
16	226.226	2.296	2.622e-11	52.412	-163.129	764.924				16	241.004	5.116	1.577	130.097	7.125	445.009				16	286.979	3.373	1.369	11.486	55.238	529.596
17	505.611	1.529	0	52.275	-68.833	1711.47				17	466.851	4.29	0.964	144.333	-144.369	895.835				17	490.499	3.334	1.124	84.667	-108.825	905.611
18	217.366	1.918	0.047	46.11	-152.808	735.263				18	191.243	5.437	1.072	138.144	-54.009	366.918				18	254.767	5.913	0.835	128.775	-18.935	470.268
19	586.533	2.761	0.817	27.114	-101.684	1985.13				19	511.291	3.568	1.071	89.733	-77.493	944.523				19	494.013	4.685	1.916	137.032	-149.876	912.187
20	208.801	5.71	0.941	135.879	-14.273	705.785				20	232.804	5.058	1.345	142.224	8.253	429.789				20	239.246	4.391	1.885	32.37	-62.87	441.441
21	516.243	3.299	1.232	92.333	-149.913	1747.43				21	421.821	4.412	1.759	149.674	-5.094	809.447				21	480.25	6.015	2.66	140.529	36.367	887.075
22	187.537	5.325	1.374	113.043	-61.736	633.533				22	189.345	5.77	2.356	120.414	-93.453	363.159				22	217.87	6.91	2.772	130.667	-53.871	401.994
23	457.767	3.413	1.003	39.667	-59.76	1548.76				23	470.378	4.877	0.942	148.657	-80.636	902.655				23	461.216	4.064	1.163	131	-157.834	851.952
24	237.744	5.292	1.109	147.209	-142.275	804.09				24	199.11	7.593	2.02	176.333	13.241	382.03				24	219.041	3.567	1.712	29.667	-68.797	403.982
25	578.263	4.131	1.055	135.733	-151.628	1957.09				25	475.26	5.897	2.412	142.667	-123.254	911.815				25	456.823	3.602	1.206	45.667	-123.384	843.795
26	201.122	4.264	1.67	69.913	-66.602	679.909				26	215.115	8.235	2.481	143.667	-28.507	412.512				26	220.212	4.735	1.907	98.667	-34.579	406.182
27	597.46	5.962	1.693	187.459	-127.04	2022.01				27	517.578	5.151	1.336	149.667	-55.51	993.357				27	453.016	3.764	1.722	50	-127.27	836.41
28	196.692	4.745	1.141	82.874	-39.872	664.512				28	207.52	5.242	2.027	153.667	36.06	398.165				28	231.633	4.654	1.832	56.667	-36.347	427.304
29	550.502	2.195	0.468	18.526	-24.749	1863.13				29	553.459	4.109	1.792	48.333	-56.007	1022.1				29	477.907	3.919	1.786	55.667	-32.229	882.793
30	214.412	2.461	0.794	18.667	-114.444	724.983				30	221.384	5.312	2.338	145.445	38.873	408.704				30	278.779	4.706	1.917	98.586	58.416	514.542
31	577.377	4.14	2.044	24.309	-137.987	1954.27				31	572.917	3.981	1.437	104.333	-3.749	1099.23				31	341.446	2.633	1.003	27.333	-100.384	630.476
32	207.029	8.313	2.311	137.237	-46.736	700.357				32	176.053	4.472	1.889	41	-91.061	337.558				32	262.088	3.591	0.716	88.667	-11.611	483.945
33	567.336	3.519	0.788	115.27	-173.719	1919.52				33	548.188	5.627	3.051	103.667	-135.13	1012.48				33	457.409	4.243	1.864	76	-5.513	844.844
34	220.024	4.026	0.419	102.021	-89.076	744.097				34	214.063	7.312	3.694	58.042	-45.666	394.917				34	272.044	6.229	2.356	138	-95.563	502.382
35	628.766	2.533	0.874	29.667	-116.637	2127.84				35	451.66	4.907	2.206	124.667	-40.467	866.707				35	444.817	7.706	4.762	60	-0.226	821.461
36	189.604	3.9	0.846	155.333	-26.086	641.327				36	227.865	4.992	2.337	18.667	49.932	436.93				36	262.088	8.286	4.367	93.667	-88.847	483.88
37	597.755	2.22	0.002	44.667	175.067	2023.49				37	503.091	4.707	1.572	120.667	-126.189	929.316				37	309.527	5.514	3.131	34.667	-95.873	571.198
38	300.059	2.508	0.336	48.692	-93.048	1015.44				38	234.268	6.818	1.778	155.667	-41.348	432.503				38	205.57	8.16	3.057	138.333	-6.882	379.368
39	449.498	2.433	0.672	40.667	-66.772	1521.32				39	509.241	4.971	1.464	150.333	58.12	940.608				39	433.396	6.046	2.251	141.667	-48.617	800.559
40	234.2	3.19	0.488	108.568	-152.464	791.682				40	252.717	8.521	2.001	159.667	-31.921	466.69				40	269.409	9.215	2.924	183	35.972	497.479
41	493.207	2.442	0.065	82.333	-56.139	1669.1				41	502.116	6.256	3.537	118.667	108.141	963.519				41	380.979	5.859	3.043	80	-79.364	703.669
42	232.428	4.051	0.318	93.386	35.995	786.092				42	194.227	8.004	3.684	159.667	18.587	372.557				42	292.25	8.281	3.19	181.947	12.865	539.535
43	507.679	3.335	1.118	112	-35.189	1717.94				43	550.673	5.633	2.702	189.129	130.803	1056.87				43	421.39	5.227	1.66	96.667	-32.563	778.196
44	255.759	5.771	1.428	110	-119.055	864.833				44	182.292	9.99	2.691	191.517	43.55	349.246				44	286.979	6.602	2.871	122.333	55.238	529.596
45	557.885	4.201	1.927	31.333	-74.33	1888.18				45	506.898	3.229	0.861	60	-77.989	936.109				45	436.325	4.049	1.229	98.94	-92.078	805.75
46	196.692	6.57	2.036	172.333	13.033	361.465				46	232.804	5.296	1.279	131.667	8.253	429.789				46	303.085	4.1	1.417	86.667	-3.659	559.6
47	750.443	3.175	0.563	34.667	13.248	1380.13				47	580.783	3.072	0.954	12.667	-107.622	1114.82				47	478.786	5.384	1.336	157.689	-168.566	884.463
48	198.464	7.346	1.069	125.333	-79.695	364.555				48	159.776	7.099	1.374	127.716	-18.435	306.346				48	282	5.139	1.466	119	-80.303	520.44
49	525.399	4.486	1.943	75.667	18.496	966.157				49	640.734	5.895	3.336	58.074	-97.595	1229.54				49	499.87	4.644	1.77	24.333	-92.822	923.227
50	248.08	7.553	1.827	139.909	-70.787	455.796				50	131.293	15.23	3.89	158.647	-6.419	251.577				50	270.873	5.562	1.333	66.333	180	500.016
51	510.337	3.779	1.201	64.667	-34.242	938.758				51	684.679	5.463	2.631	119.312	-51.276	1313.81				51	479.957	5.013	1.725	83.667	-90.21	886.398
52	226.226	4.708	1.271	57.667	-123.815	416.002				52	135.634	9.735	3.045	144.658	39.629	259.676				52	298.985	4.989	1.667	62	0	551.966
53	542.823	5.752	1.393	158.396	-39.566	998.22				53	554.63	4.148	1.677	62	-54.547	1024.37				53	490.792	2.979	1.01	53	-177.742	906.577
54	225.93	5.295	1.684	63.333	55.561	415.132				54	224.605	5.347	2.248	151.667	40.553	414.505				54	348.767	4.244	1.333	91.333	-93.468	644.057
55	599.232	3.803	1.109	95	-44.041	1102.25				55	592.719	6.715	2.572	29	-0.472	1137.54				55	584.792	6.427	3.305	77.667	-10.567	1080.04
56	224.454	12.494	1.778	171.174	44.68	412.717				56	177.68	12.424	3.7	184.26	88.949	340.682				56	275.558	5.732	3.345	66.333	74.456	508.887
57	552.865	4.55	0.868	132	-170.961	1016.92				57	545.845	5.942	3.047	131.333	-135.653	1007.95				57	510.119	4.14	1.573	96.333	-106.624	941.997
58	253.101	7.95	0.933	140.667	-84.369	465.261				58	211.427	6.962	3.953	43.333	-44.326	390.326				58	282.293	4.276	1.68	78.333	-16.289	520.926
59	708.21	3.912	0.973	132.333	-98.637	1302.74				59	546.061	3.99	1.338	109.83	-56.31	1047.86				59	430.468	3.285	1.479	53	-42.683	795.022
60	179.858	4.661	1.667	70.811	-9.09	330.215				60	180.122	4.501	1.807	69	31.675	345.168				60	339.982	3.729	1.705	90.667	50.877	627.778

## Sheet: Larval size
Date	Condition	Size
2019	Nature	1001.5
2019	Nature	1706.85
2019	Nature	1857.87
2019	Nature	1966.85
2019	Nature	1653.95
2019	Nature	2033.5
2019	Nature	1893.27
2019	Nature	1741.96
2019	Nature	1711.47
2019	Nature	1985.13
2019	Nature	1747.43
2019	Nature	1548.76
2019	Nature	1957.09
2019	Nature	2022.01
2019	Nature	1863.13
2019	Nature	1954.27
2019	Nature	1919.52
2019	Nature	2127.84
2019	Nature	2023.49
2019	Nature	1521.32
2019	Nature	1669.1
2019	Nature	1717.94
2019	Nature	1888.18
2019	Nature	1380.13
2019	Nature	966.157
2019	Nature	938.758
2019	Nature	998.22
2019	Nature	1102.25
2019	Nature	1016.92
2019	Nature	1302.74
2019	Control	1403.24
2019	Control	1551.22
2019	Control	1710.22
2019	Control	833.719
2019	Control	2110.13
2019	Control	952.387
2019	Control	1000.49
2019	Control	912.782
2019	Control	895.835
2019	Control	944.523
2019	Control	809.447
2019	Control	902.655
2019	Control	911.815
2019	Control	993.357
2019	Control	1022.1
2019	Control	1099.23
2019	Control	1012.48
2019	Control	866.707
2019	Control	929.316
2019	Control	940.608
2019	Control	963.519
2019	Control	1056.87
2019	Control	936.109
2019	Control	1114.82
2019	Control	1229.54
2019	Control	1313.81
2019	Control	1024.37
2019	Control	1137.54
2019	Control	1007.95
2019	Control	1047.86
2019	Stress	915.821
2019	Stress	891.473
2019	Stress	1012.46
2019	Stress	953.233
2019	Stress	898.816
2019	Stress	988.842
2019	Stress	915.878
2019	Stress	979.937
2019	Stress	905.611
2019	Stress	912.187
2019	Stress	887.075
2019	Stress	851.952
2019	Stress	843.795
2019	Stress	836.41
2019	Stress	882.793
2019	Stress	630.476
2019	Stress	844.844
2019	Stress	821.461
2019	Stress	571.198
2019	Stress	800.559
2019	Stress	703.669
2019	Stress	778.196
2019	Stress	805.75
2019	Stress	884.463
2019	Stress	923.227
2019	Stress	886.398
2019	Stress	906.577
2019	Stress	1080.04
2019	Stress	941.997
2019	Stress	795.022

## Sheet: Settlement rate
Days	Condition	Code	Total larvae	NoSettled
1	Nature Control	NC	100	38
1	Nature Control	NC	100	41
1	Nature Control	NC	100	44
1	Nature Control	NC	100	55
1	Nature Control	NC	100	36
2	Nature Control	NC	100	66
2	Nature Control	NC	100	60
2	Nature Control	NC	100	60
2	Nature Control	NC	100	66
2	Nature Control	NC	100	46
1	Nature Stress	NS	100	58
1	Nature Stress	NS	100	51
1	Nature Stress	NS	100	59
1	Nature Stress	NS	100	55
1	Nature Stress	NS	100	46
2	Nature Stress	NS	100	82
2	Nature Stress	NS	100	76
2	Nature Stress	NS	100	94
2	Nature Stress	NS	100	87
2	Nature Stress	NS	100	83
1	Control Control	CC	100	35
1	Control Control	CC	100	10
1	Control Control	CC	100	29
1	Control Control	CC	100	21
1	Control Control	CC	100	34
2	Control Control	CC	100	74
2	Control Control	CC	100	78
2	Control Control	CC	100	68
2	Control Control	CC	100	72
2	Control Control	CC	100	80
1	Control Stress	CS	100	49
1	Control Stress	CS	100	63
1	Control Stress	CS	100	64
1	Control Stress	CS	100	58
1	Control Stress	CS	100	71
2	Control Stress	CS	100	77
2	Control Stress	CS	100	82
2	Control Stress	CS	100	84
2	Control Stress	CS	100	84
2	Control Stress	CS	100	86
1	Stress Control	SC	100	25
1	Stress Control	SC	100	42
1	Stress Control	SC	100	13
1	Stress Control	SC	100	38
1	Stress Control	SC	100	62
2	Stress Control	SC	100	76
2	Stress Control	SC	100	85
2	Stress Control	SC	100	72
2	Stress Control	SC	100	87
2	Stress Control	SC	100	89
1	Stress Stress	SS	100	56
1	Stress Stress	SS	100	66
1	Stress Stress	SS	100	59
1	Stress Stress	SS	100	27
1	Stress Stress	SS	100	54
2	Stress Stress	SS	100	77
2	Stress Stress	SS	100	75
2	Stress Stress	SS	100	75
2	Stress Stress	SS	100	37
2	Stress Stress	SS	100	82

[truncated: 2 more sheets: Settlement size, Recruit under thermal stress]
